# Supplementary material for: Synthesis of furostanol glycosides: discovery of a potent α-glucosidase inhibitor
Source: Royal Society of Chemistry journal article supplement (doi:10.1039/c6ob01766e), 2016-01-01
Supplement: c6ob01766e1.pdf [file c6ob01766e1.pdf]

## Electronic Supporting Information

### Synthesis of Furostanol Glycosides: Discovery of a Potent $\alpha$ -Glucosidase Inhibitor

*Peng Wang, Jiejie Hao, Xiuli Zhang, Cong Wang, Huashi Guan and Ming Li\**

Key Laboratory of Marine Medicine, Chinese Ministry of Education, School of Medicine and Pharmacy, Ocean University of China, 5 Yushan Road, Qingdao, Shandong 266003, China.

E-mail: lmsnouc@ouc.edu.cn

### Content

|                                                                                            |            |
|--------------------------------------------------------------------------------------------|------------|
| <sup>1</sup> H NMR and <sup>13</sup> C NMR spectra of compound <b>11</b>                   | <b>S2</b>  |
| <sup>1</sup> H NMR and <sup>13</sup> C NMR spectra of compound <b>10</b>                   | <b>S3</b>  |
| <sup>1</sup> H NMR and <sup>13</sup> C NMR spectra of compound <b>19</b>                   | <b>S4</b>  |
| <sup>1</sup> H NMR and <sup>13</sup> C NMR spectra of compound <b>20</b>                   | <b>S5</b>  |
| <sup>1</sup> H NMR and <sup>13</sup> C NMR spectra of compound <b>22</b>                   | <b>S6</b>  |
| <sup>1</sup> H NMR and <sup>13</sup> C NMR spectra of compound <b>17</b>                   | <b>S7</b>  |
| <sup>1</sup> H NMR and <sup>13</sup> C NMR spectra of compound <b>9</b>                    | <b>S8</b>  |
| <sup>1</sup> H NMR and <sup>13</sup> C NMR spectra of compound <b>23</b>                   | <b>S9</b>  |
| <sup>1</sup> H NMR and <sup>13</sup> C NMR spectra of compound <b>24</b>                   | <b>S10</b> |
| <sup>1</sup> H NMR and <sup>13</sup> C NMR spectra of compound <b>25</b>                   | <b>S11</b> |
| <sup>1</sup> H NMR and <sup>13</sup> C NMR spectra of compound <b>8</b>                    | <b>S12</b> |
| <sup>1</sup> H NMR and <sup>13</sup> C NMR spectra of compound <b>26</b>                   | <b>S13</b> |
| <sup>1</sup> H NMR and <sup>13</sup> C NMR spectra of compound <b>27</b>                   | <b>S14</b> |
| <sup>1</sup> H NMR and <sup>13</sup> C NMR spectra of compound <b>28</b>                   | <b>S15</b> |
| <sup>1</sup> H NMR and <sup>13</sup> C NMR spectra of compound <b>29</b>                   | <b>S16</b> |
| <sup>1</sup> H NMR and <sup>13</sup> C NMR spectra of compound <b>30</b>                   | <b>S17</b> |
| <sup>1</sup> H NMR and <sup>13</sup> C NMR spectra of compound <b>31</b>                   | <b>S18</b> |
| <sup>1</sup> H NMR and <sup>13</sup> C NMR spectra of compound <b>32</b>                   | <b>S19</b> |
| <sup>1</sup> H NMR and <sup>13</sup> C NMR spectra of compound <b>33</b>                   | <b>S20</b> |
| <sup>1</sup> H NMR and <sup>13</sup> C NMR spectra of compound <b>1</b> (Funlioside)       | <b>S21</b> |
| <sup>13</sup> C NMR data for funlioside B                                                  | <b>S22</b> |
| <sup>1</sup> H NMR and <sup>13</sup> C NMR spectra of compound <b>2</b> (Lilioglycoside)   | <b>S23</b> |
| <sup>13</sup> C NMR data for lilioglycoside                                                | <b>S24</b> |
| <sup>1</sup> H NMR and <sup>13</sup> C NMR spectra of compound <b>3</b> (Protobioside I)   | <b>S25</b> |
| <sup>13</sup> C NMR data for protobioside I                                                | <b>S26</b> |
| <sup>1</sup> H NMR and <sup>13</sup> C NMR spectra of compound <b>4</b> (Protodioscin)     | <b>S27</b> |
| <sup>13</sup> C NMR data for protodioscin                                                  | <b>S28</b> |
| <sup>1</sup> H NMR and <sup>13</sup> C NMR spectra of compound <b>5</b> (Pallidifloside I) | <b>S29</b> |
| <sup>13</sup> C NMR data for pallidifloside I                                              | <b>S30</b> |
| <sup>1</sup> H NMR and <sup>13</sup> C NMR spectra of compound <b>6</b> (Coreajaponins A)  | <b>S31</b> |
| <sup>13</sup> C NMR data for Coreajaponins A                                               | <b>S32</b> |
| <sup>1</sup> H NMR and <sup>13</sup> C NMR spectra of compound <b>7</b> (Parisaponin I)    | <b>S33</b> |
| <sup>13</sup> C NMR data for Parisaponin I                                                 | <b>S34</b> |

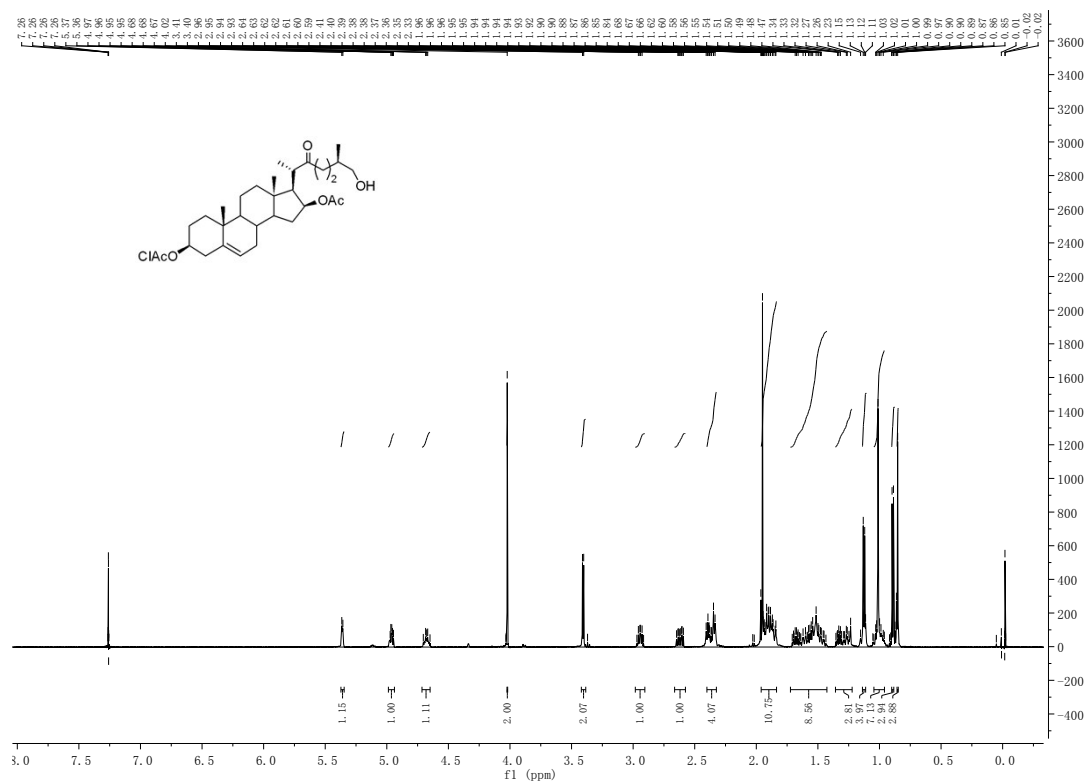

The <sup>1</sup>H NMR spectrum of 11 (CDCl<sub>3</sub>, 600 MHz)

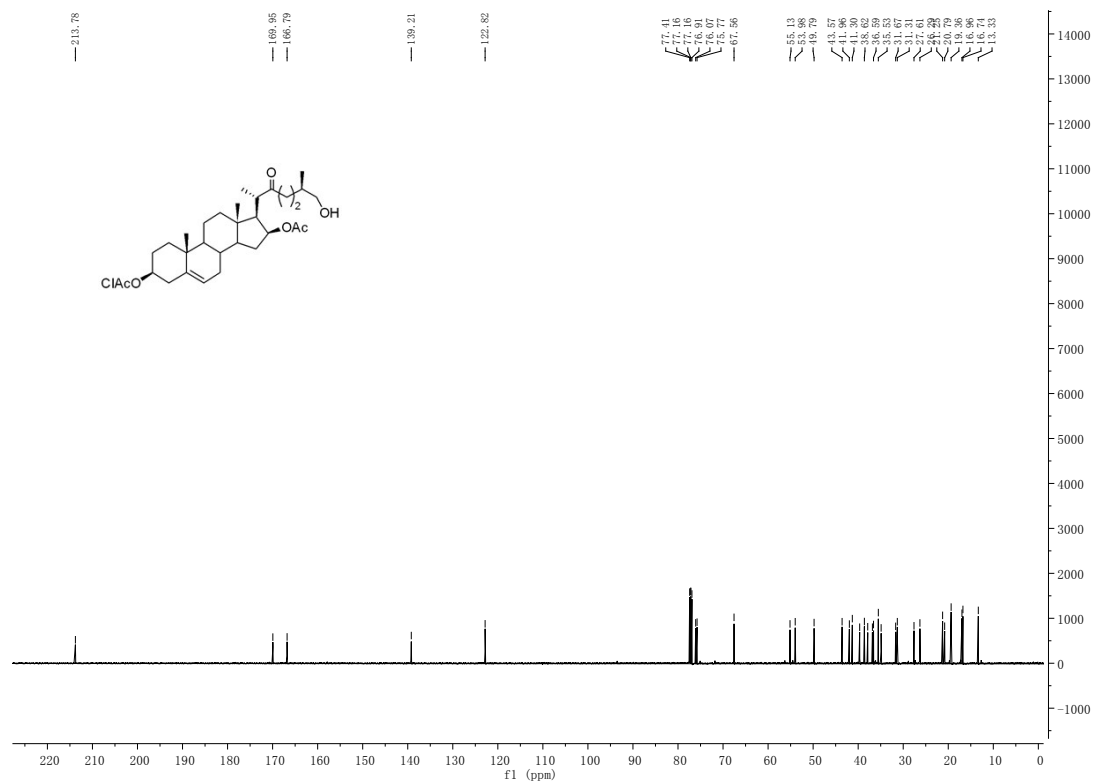

The <sup>13</sup>C NMR spectrum of 11 (CDCl<sub>3</sub>, 150 MHz)

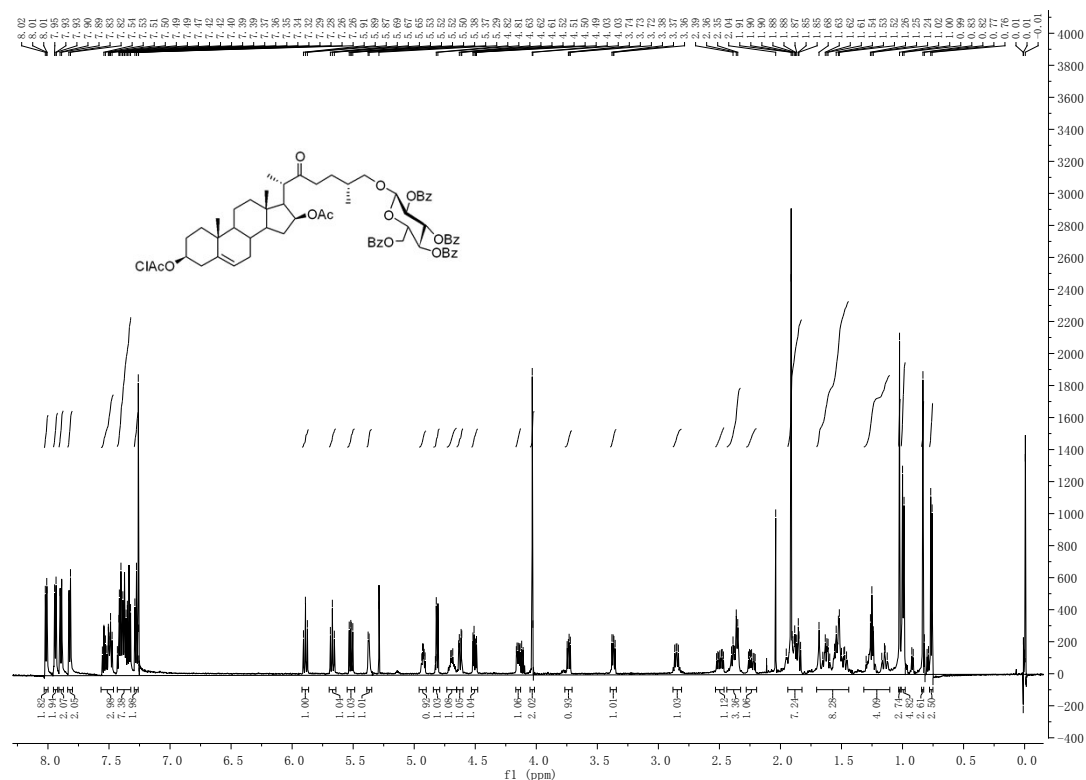

The  $^1\text{H}$  NMR spectrum of **10** ( $\text{CDCl}_3$ , 600 MHz)

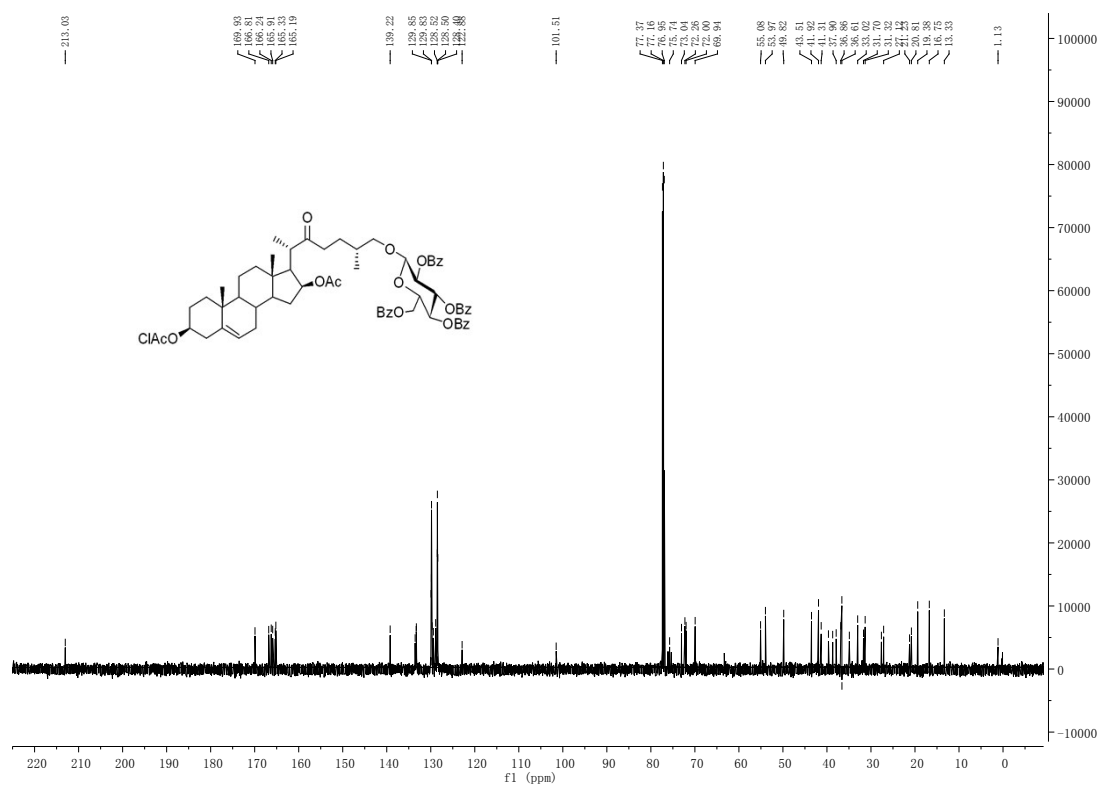

The  $^{13}\text{C}$  NMR spectrum of **10** ( $\text{CDCl}_3$ , 150 MHz)

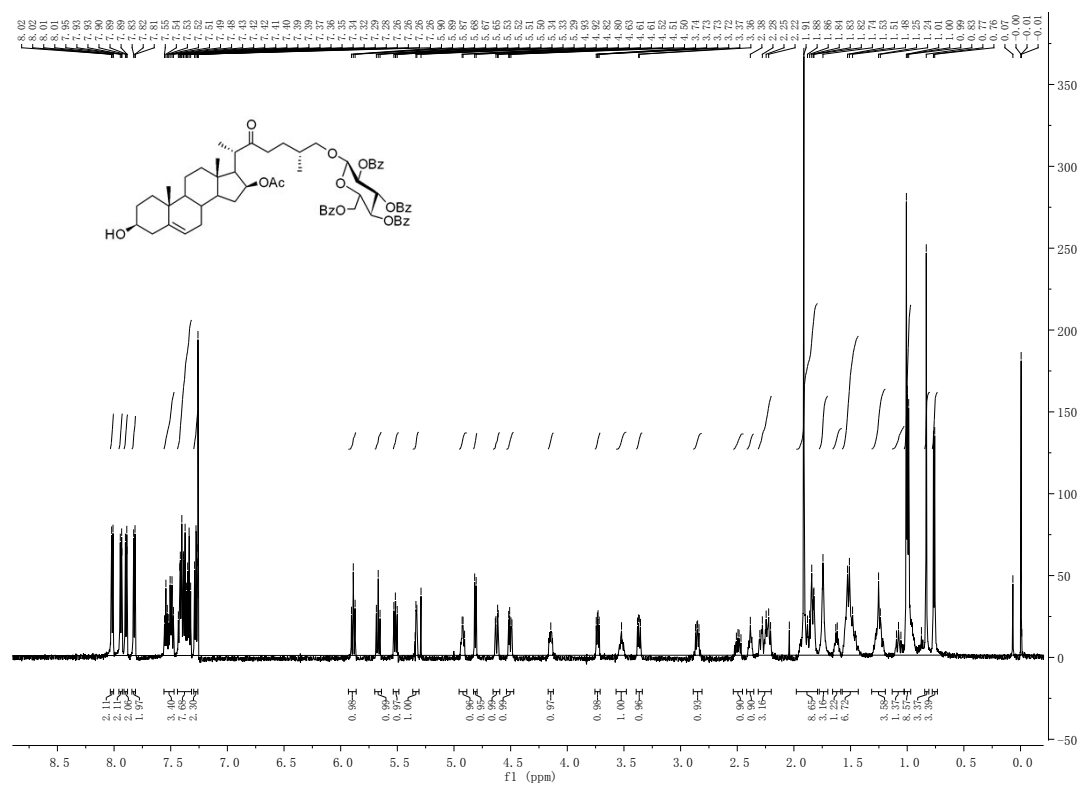

The <sup>1</sup>H NMR spectrum of **19** (CDCl<sub>3</sub>, 600 MHz)

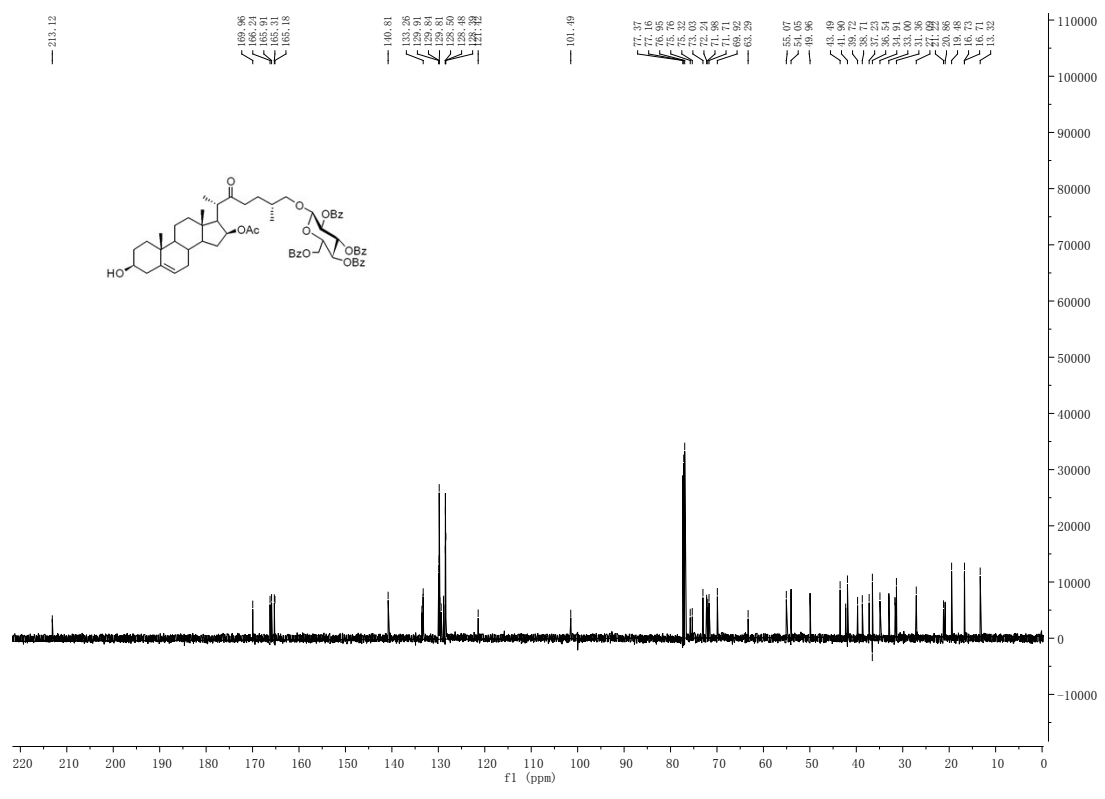

The <sup>13</sup>C NMR spectrum of **19** (CDCl<sub>3</sub>, 150 MHz)

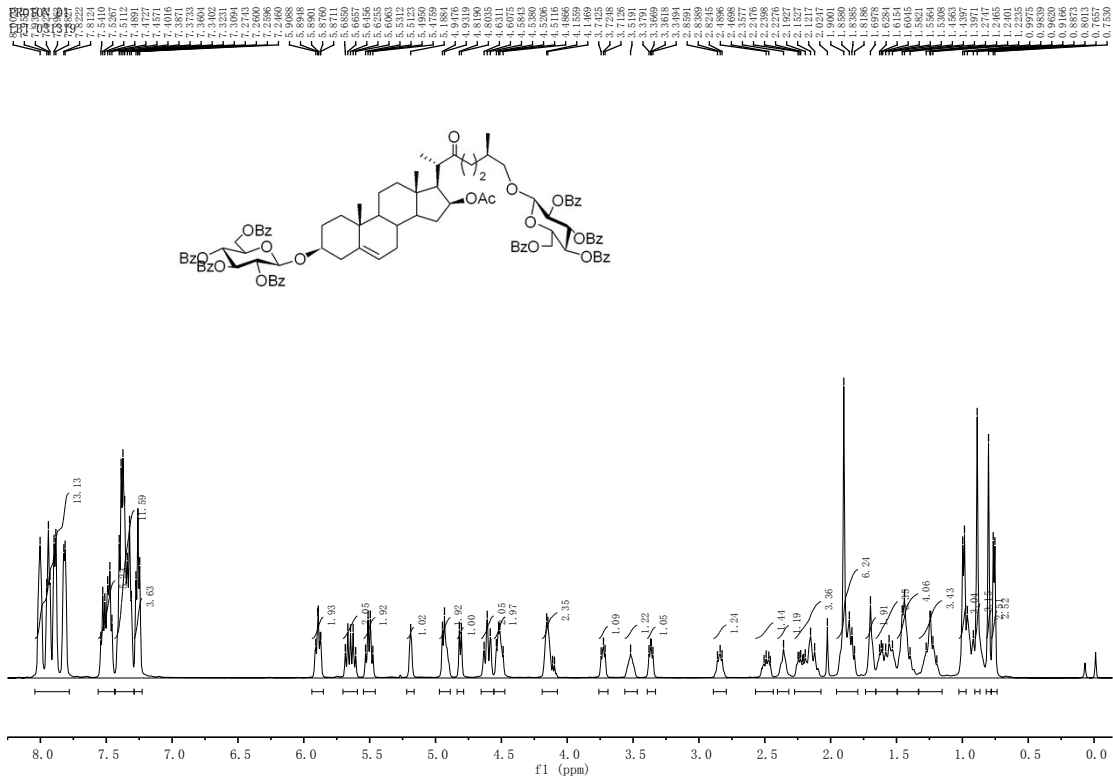

The  $^1\text{H}$  NMR spectrum of **20** ( $\text{CDCl}_3$ , 600 MHz)

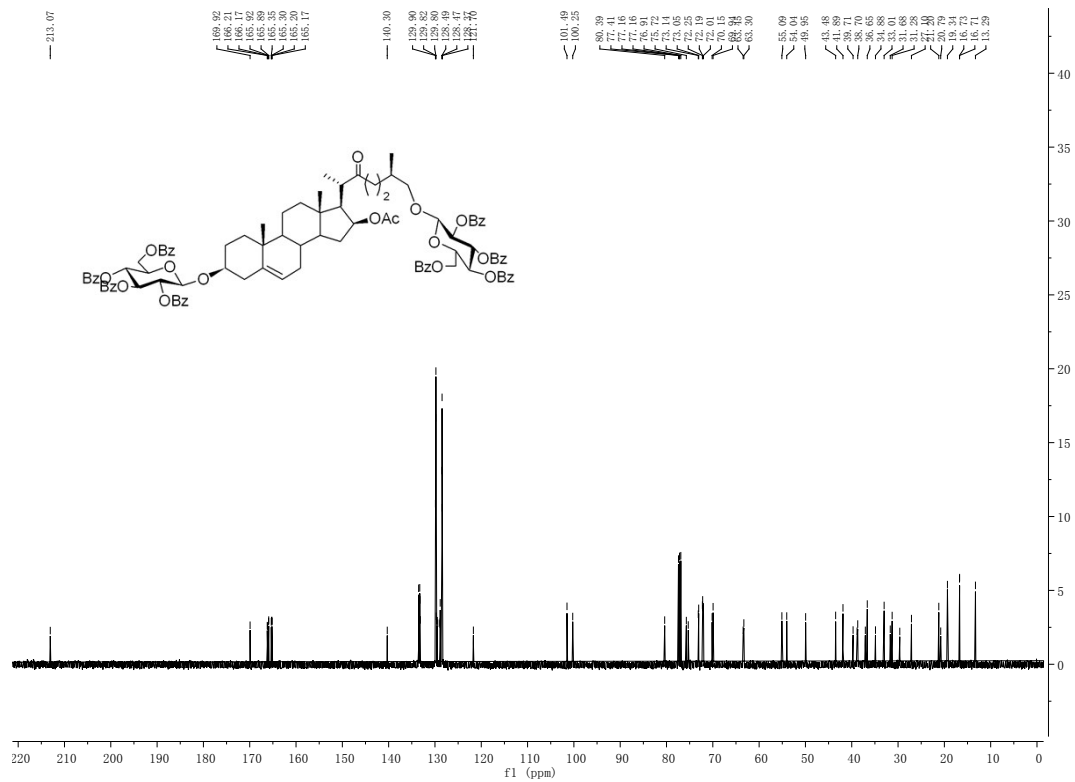

The  $^{13}\text{C}$  NMR spectrum of **20** ( $\text{CDCl}_3$ , 150 MHz)

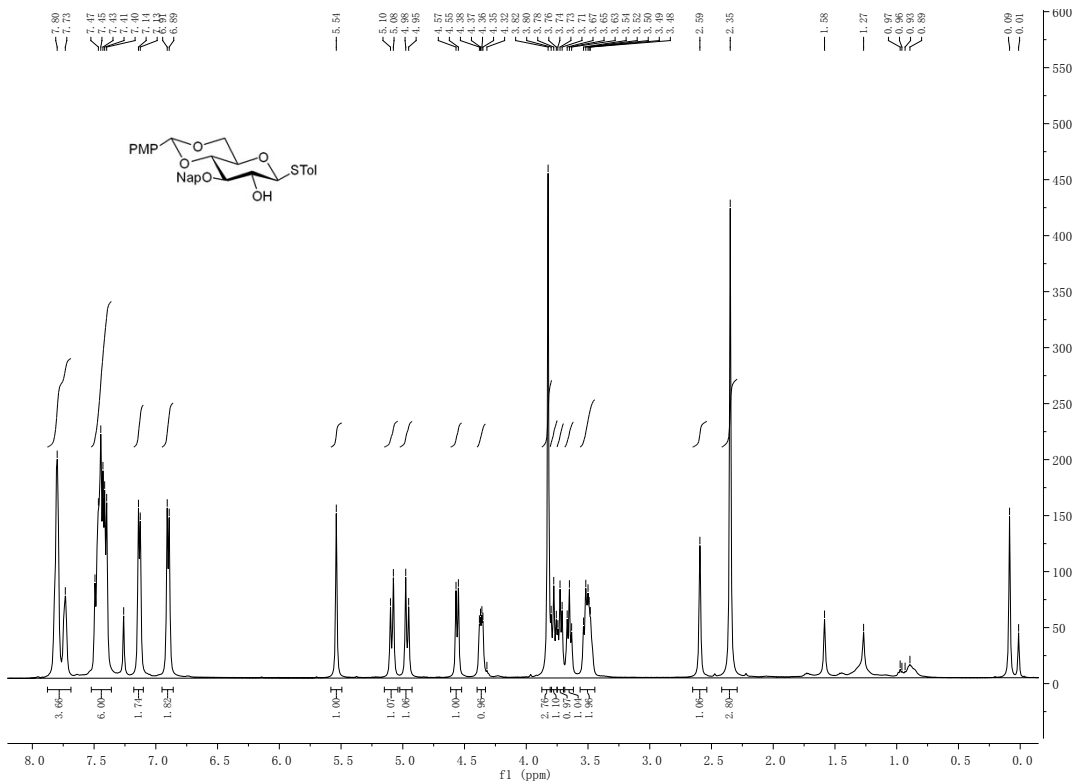

The <sup>1</sup>H NMR spectrum of **22** (CDCl<sub>3</sub>, 600 MHz)

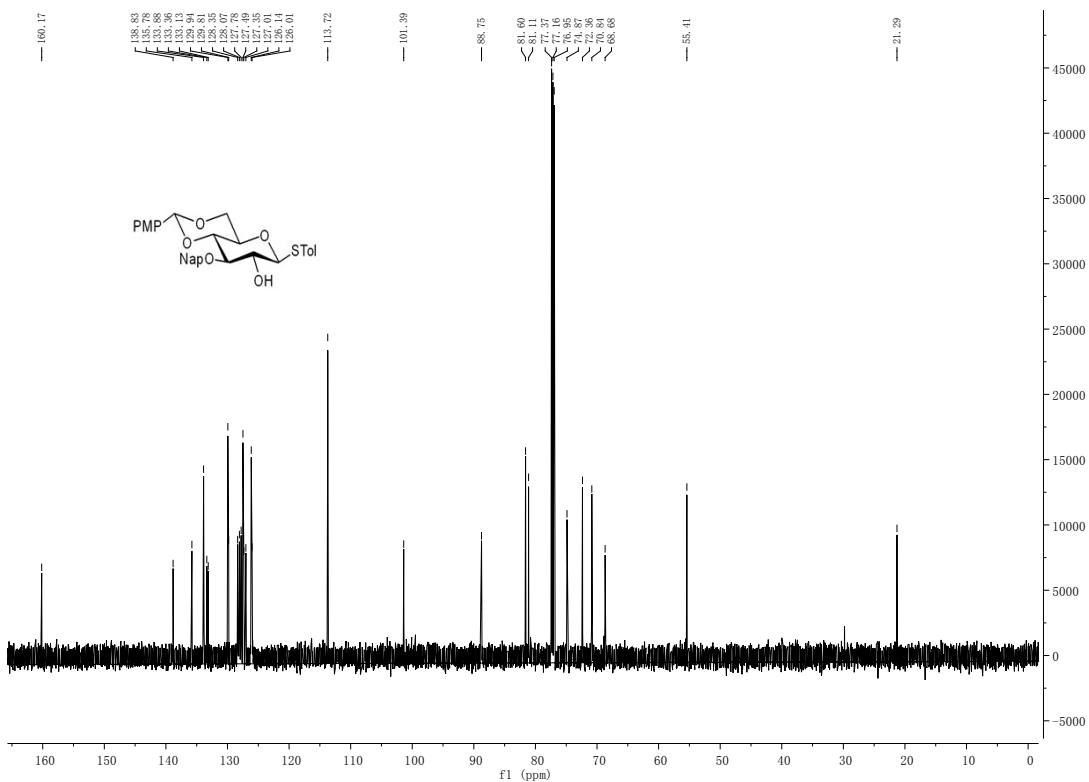

The <sup>13</sup>C NMR spectrum of **22** (CDCl<sub>3</sub>, 150 MHz)



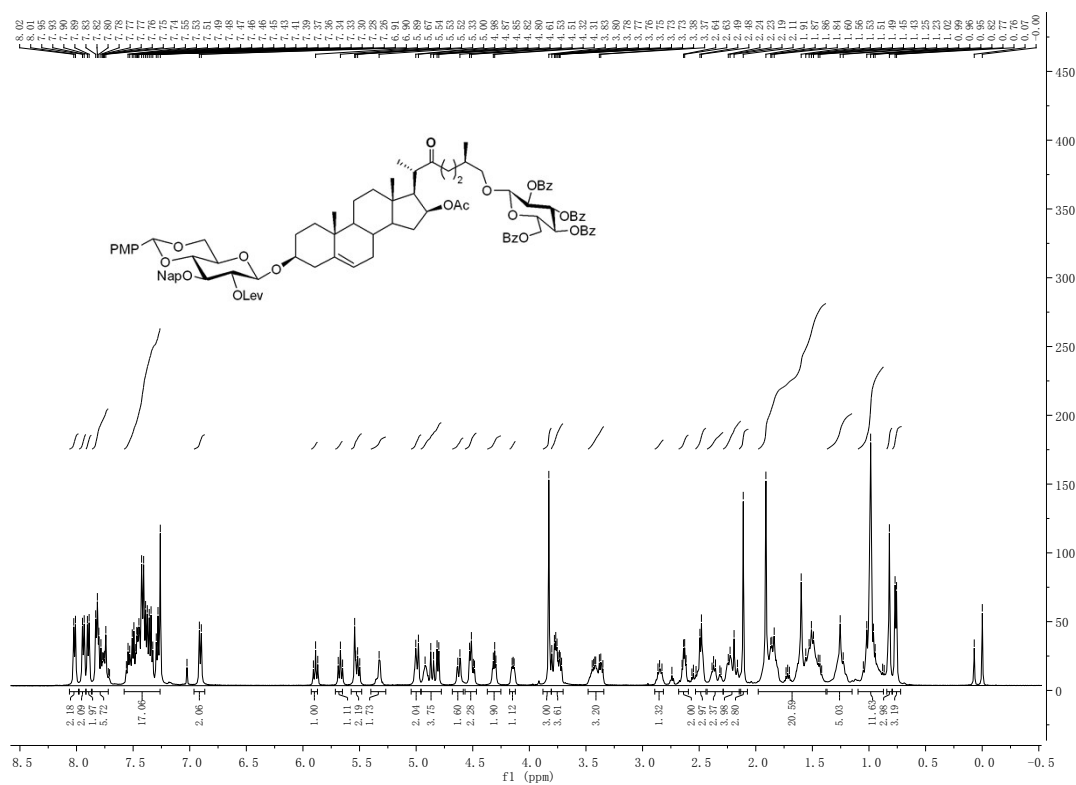

The <sup>1</sup>H NMR spectrum of **9** (CDCl<sub>3</sub>, 600 MHz)

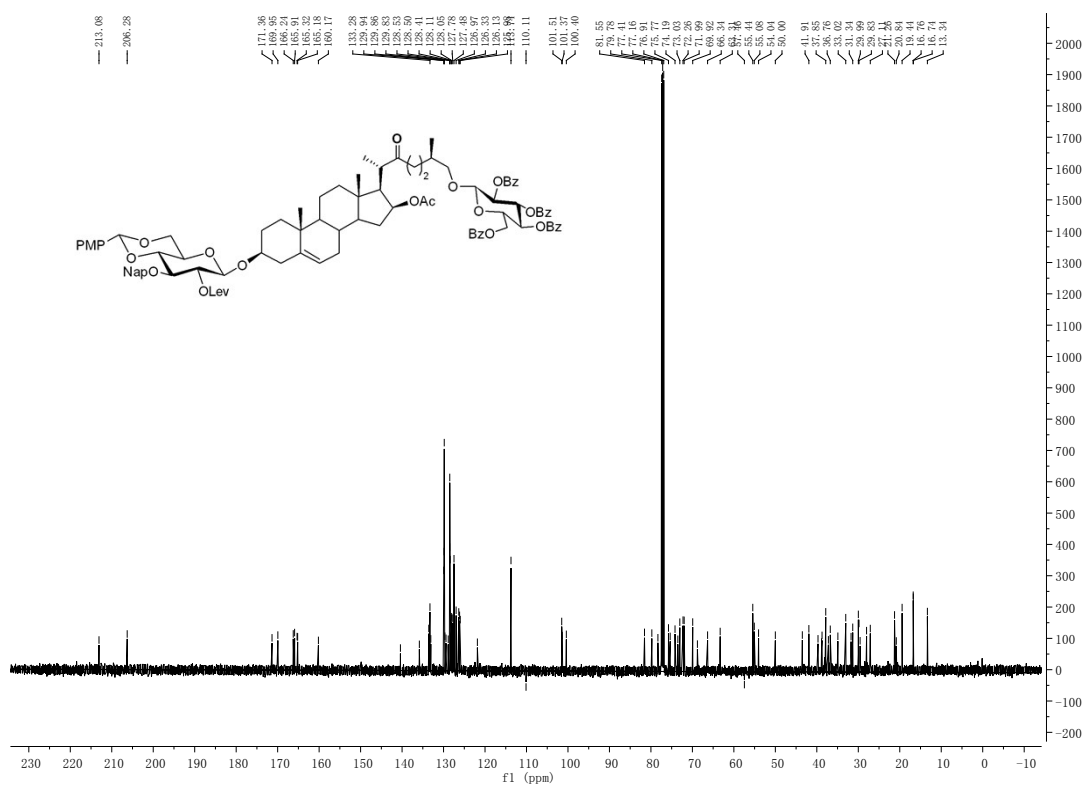

The <sup>13</sup>C NMR spectrum of **9** (CDCl<sub>3</sub>, 150 MHz)





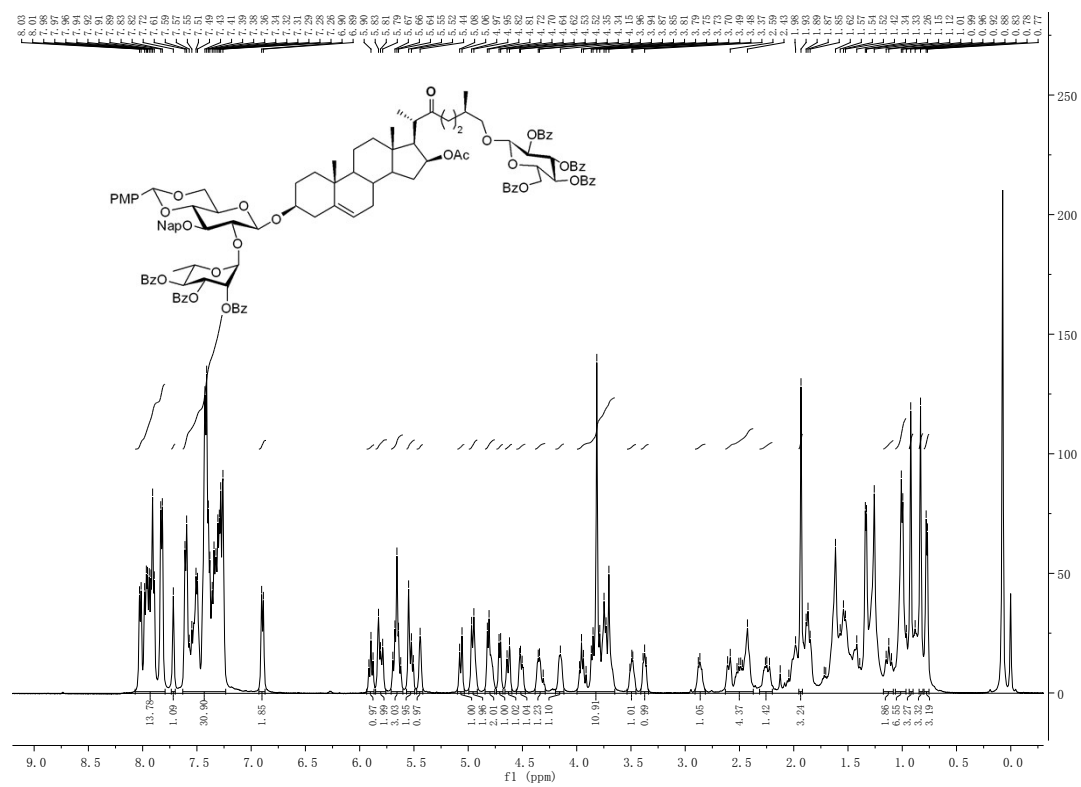

The <sup>1</sup>H NMR spectrum of **24** (CDCl<sub>3</sub>, 600 MHz)

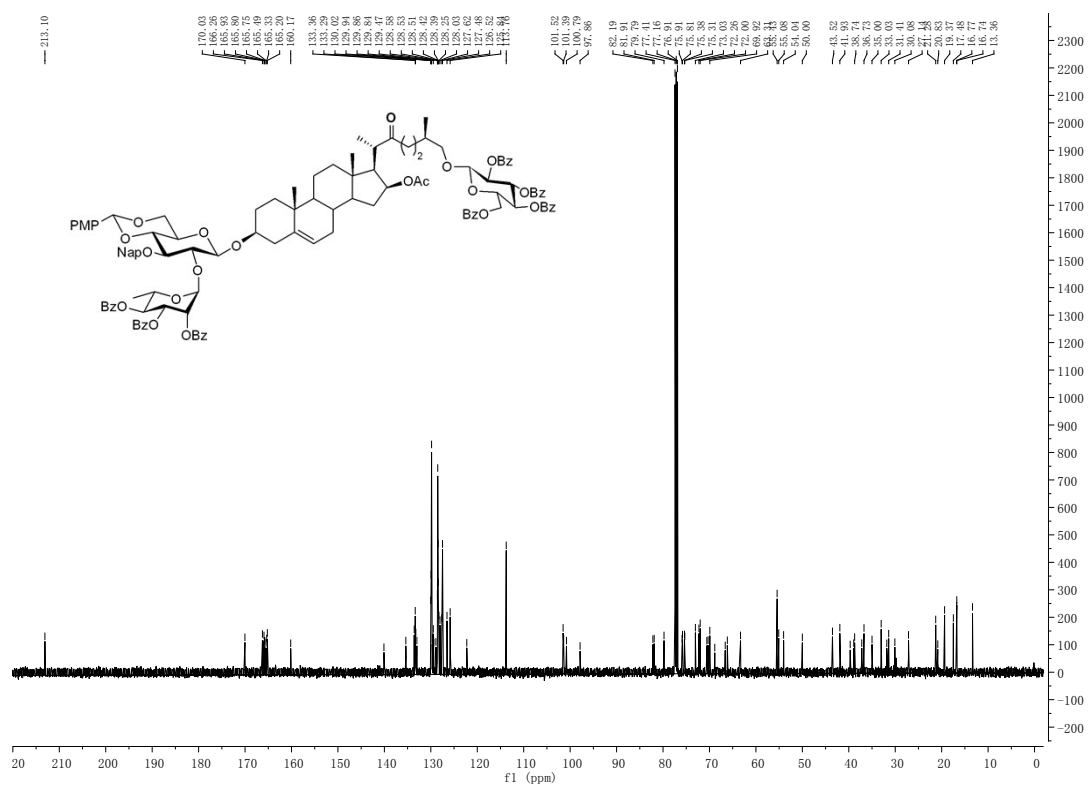

The <sup>13</sup>C NMR spectrum of **24** (CDCl<sub>3</sub>, 150 MHz)



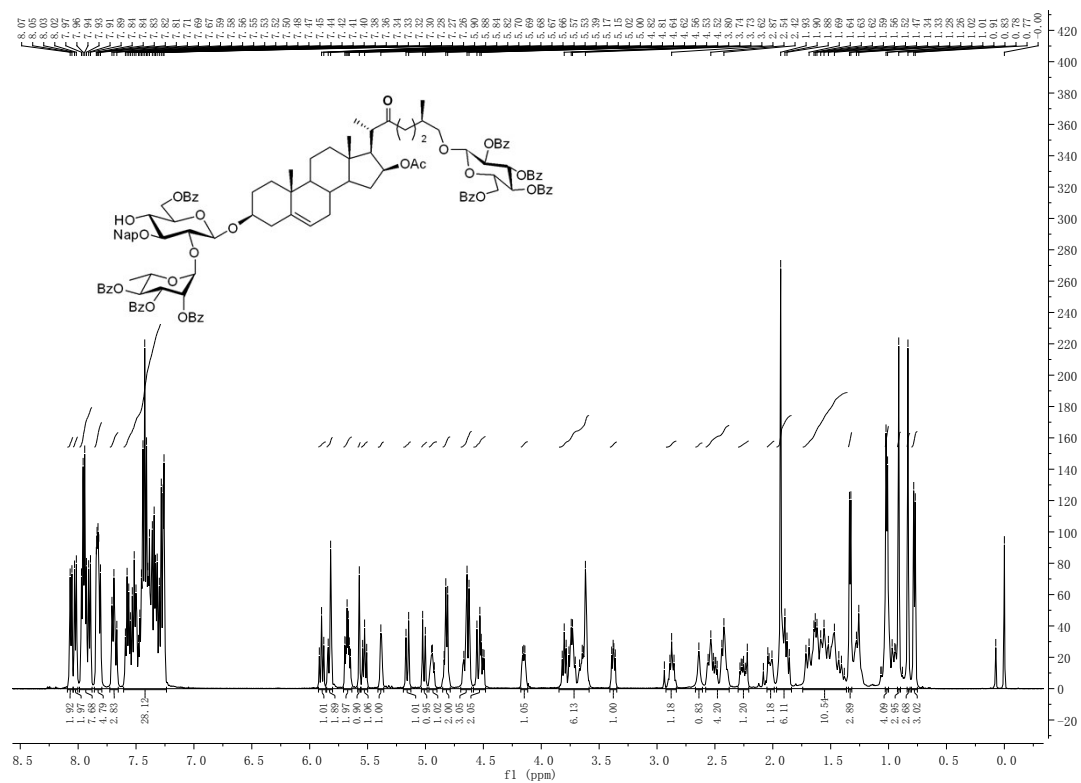

The  $^1\text{H}$  NMR spectrum of **8** ( $\text{CDCl}_3$ , 600 MHz)

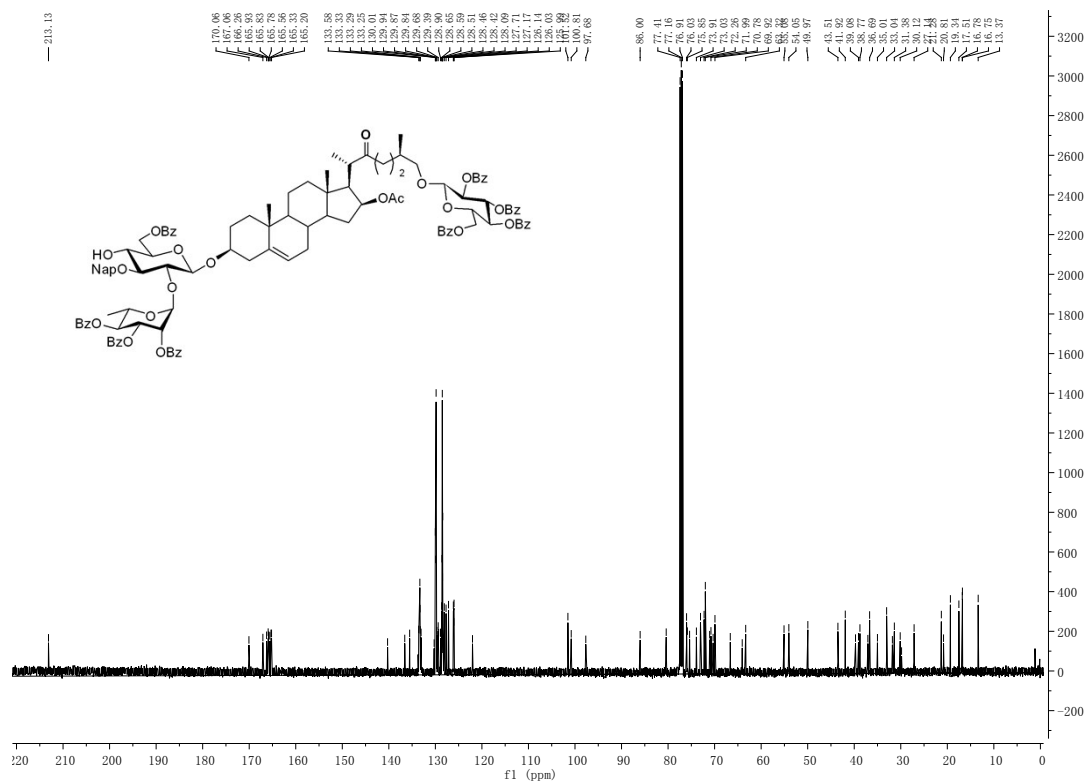

The  $^{13}\text{C}$  NMR spectrum of **8** ( $\text{CDCl}_3$ , 150 MHz)

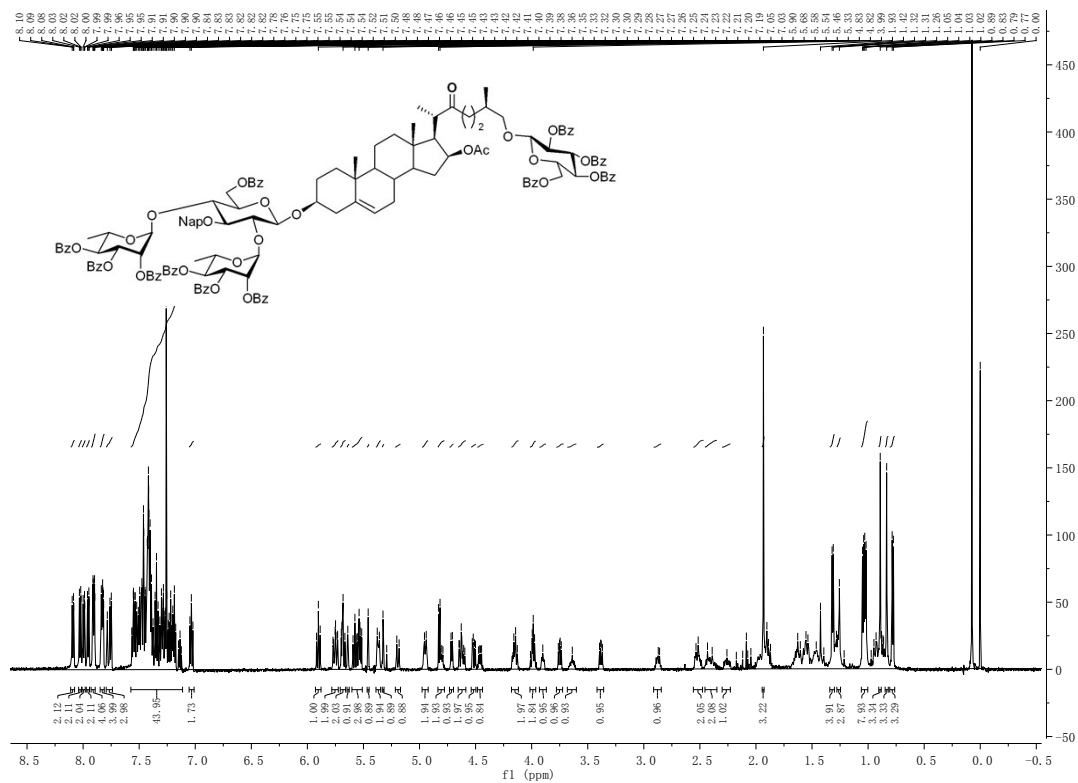

The  $^1\text{H}$  NMR spectrum of **26** ( $\text{CDCl}_3$ , 600 MHz)

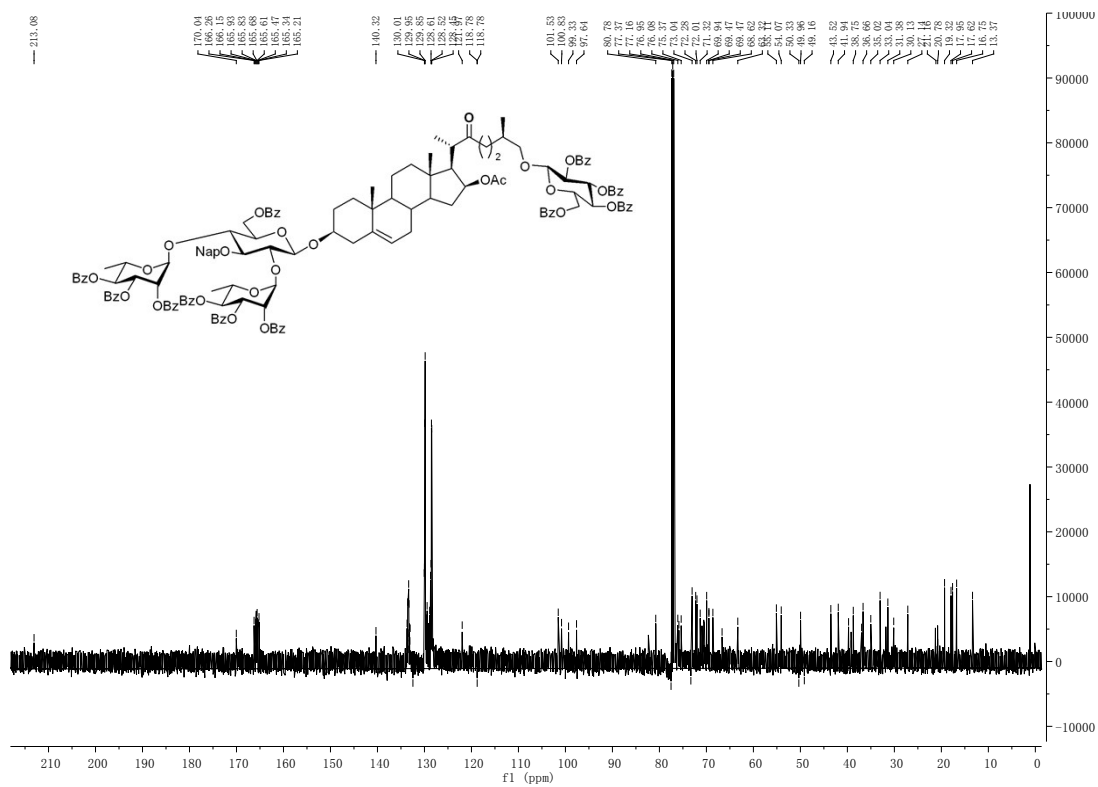

The  $^{13}\text{C}$  NMR spectrum of **26** ( $\text{CDCl}_3$ , 150 MHz)









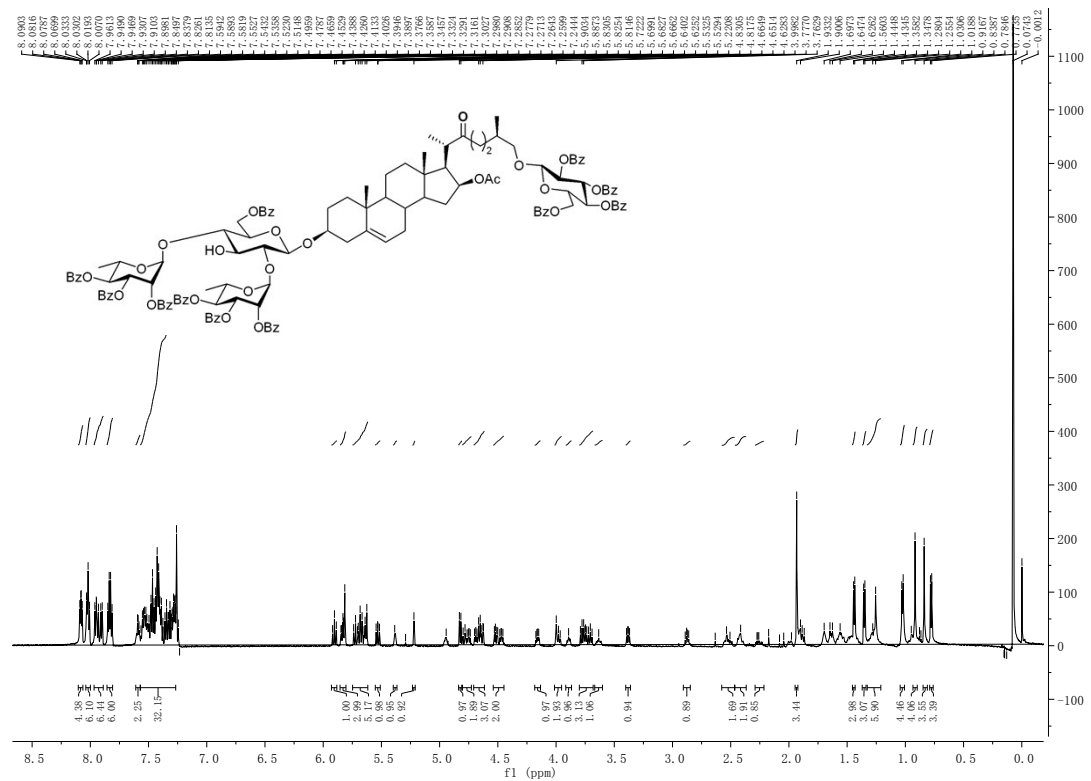

The  $^1\text{H}$  NMR spectrum of **30** ( $\text{CDCl}_3$ , 600 MHz)

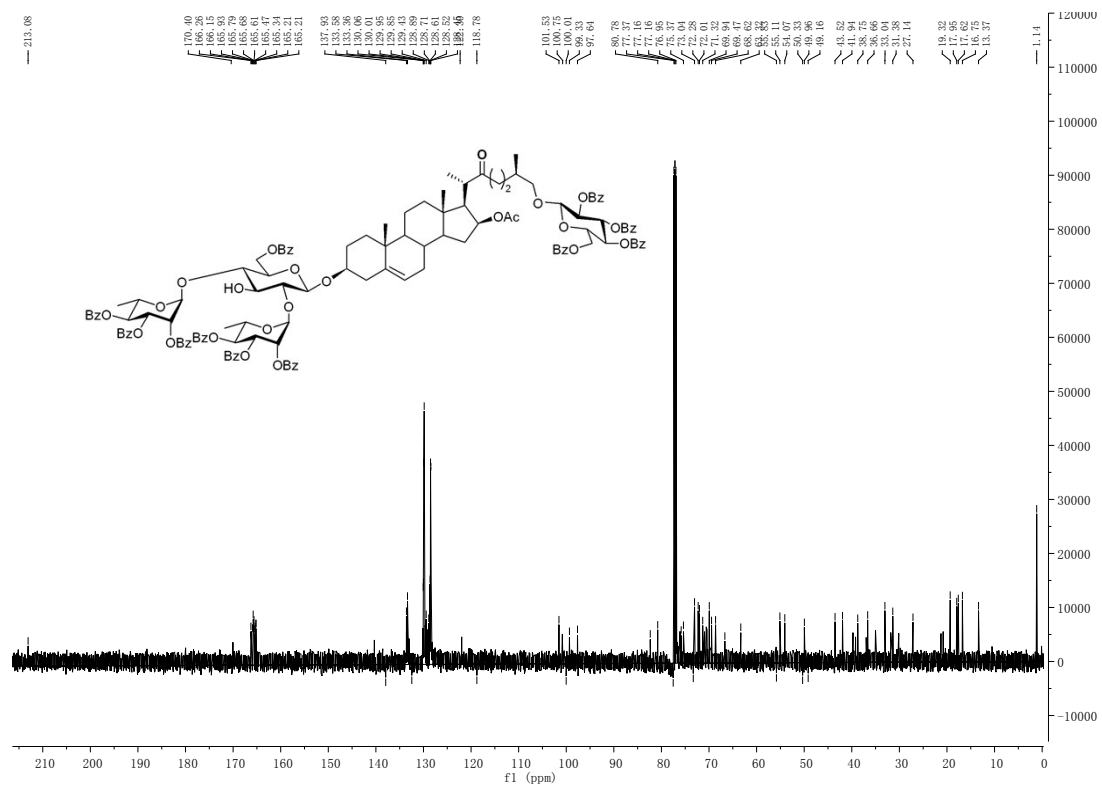

The  $^{13}\text{C}$  NMR spectrum of **30** ( $\text{CDCl}_3$ , 150 MHz)

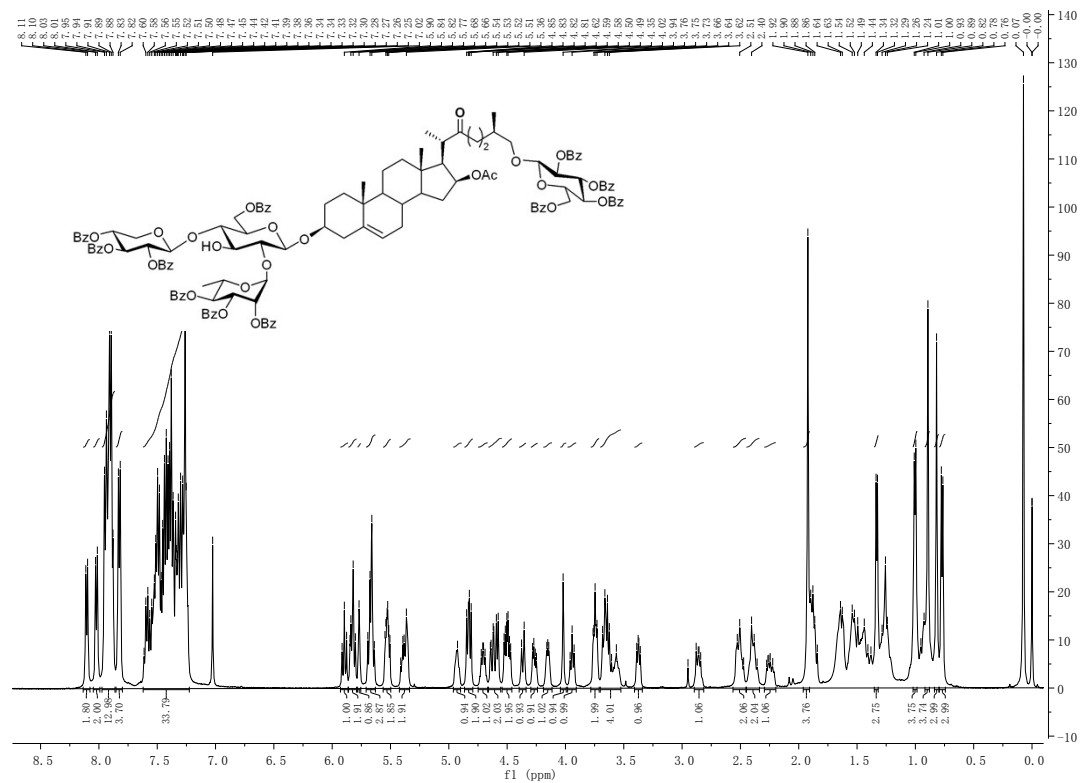

The <sup>1</sup>H NMR spectrum of **31** (CDCl<sub>3</sub>, 600 MHz)

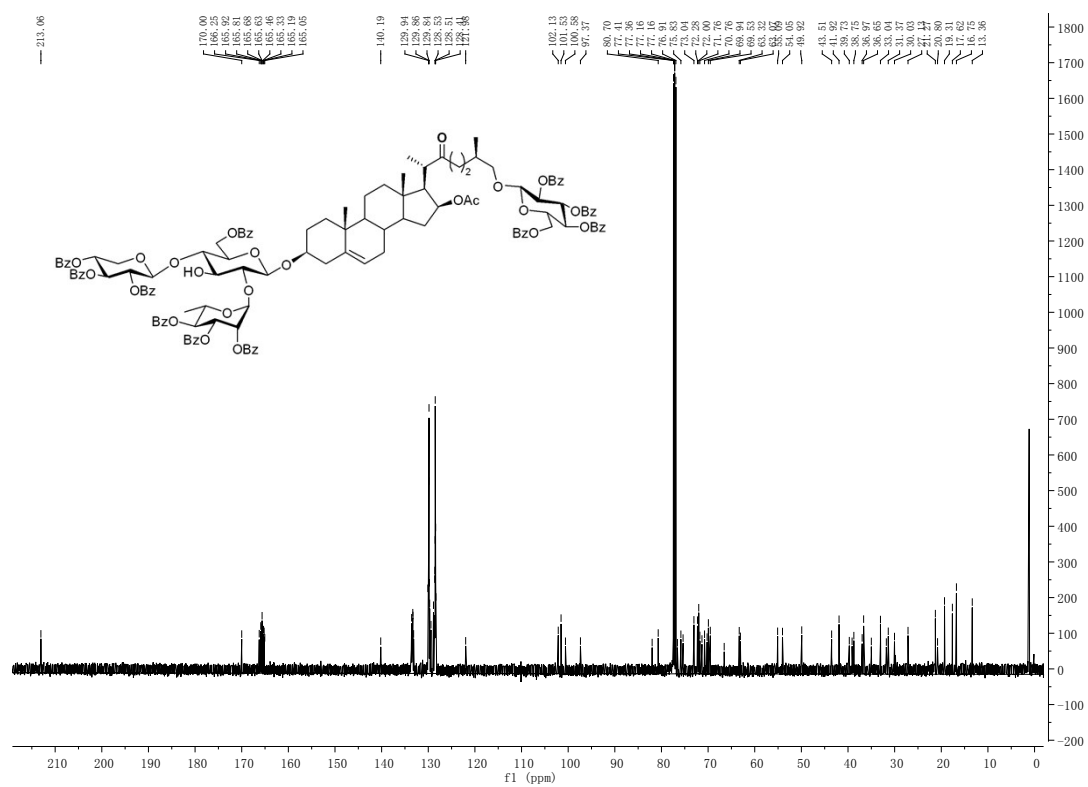

The <sup>13</sup>C NMR spectrum of **31** (CDCl<sub>3</sub>, 150 MHz)

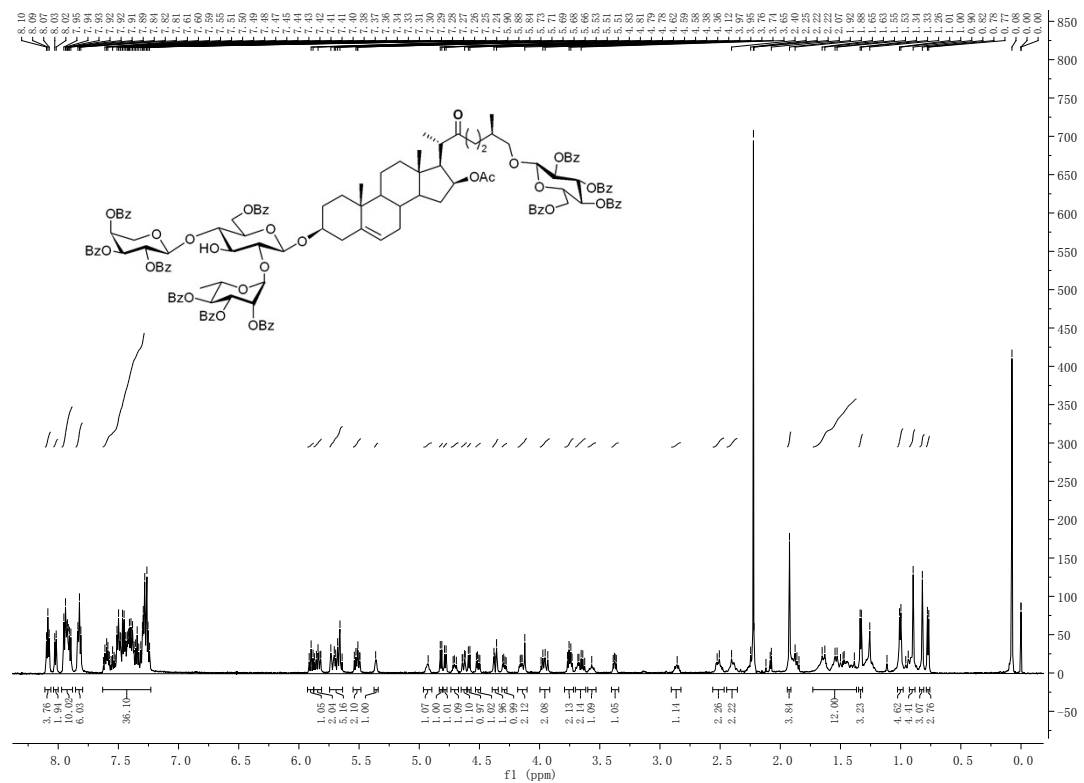

The  $^1\text{H}$  NMR spectrum of **32** ( $\text{CDCl}_3$ , 600 MHz)

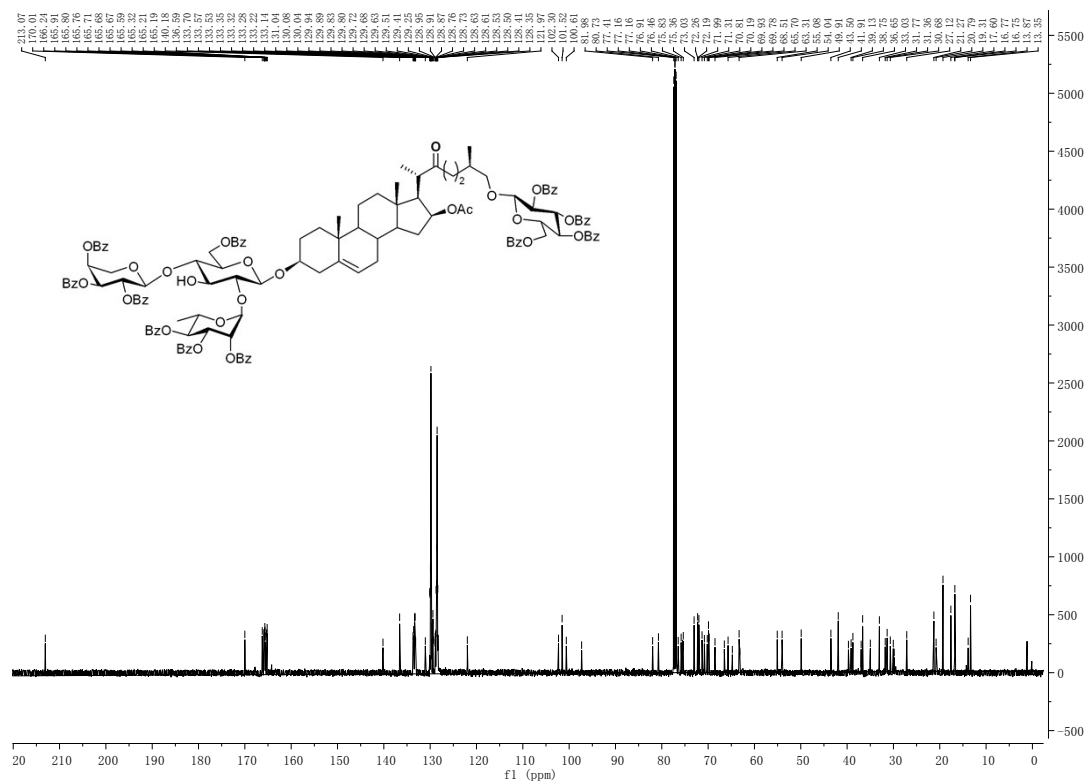

The  $^{13}\text{C}$  NMR spectrum of **32** ( $\text{CDCl}_3$ , 150 MHz)

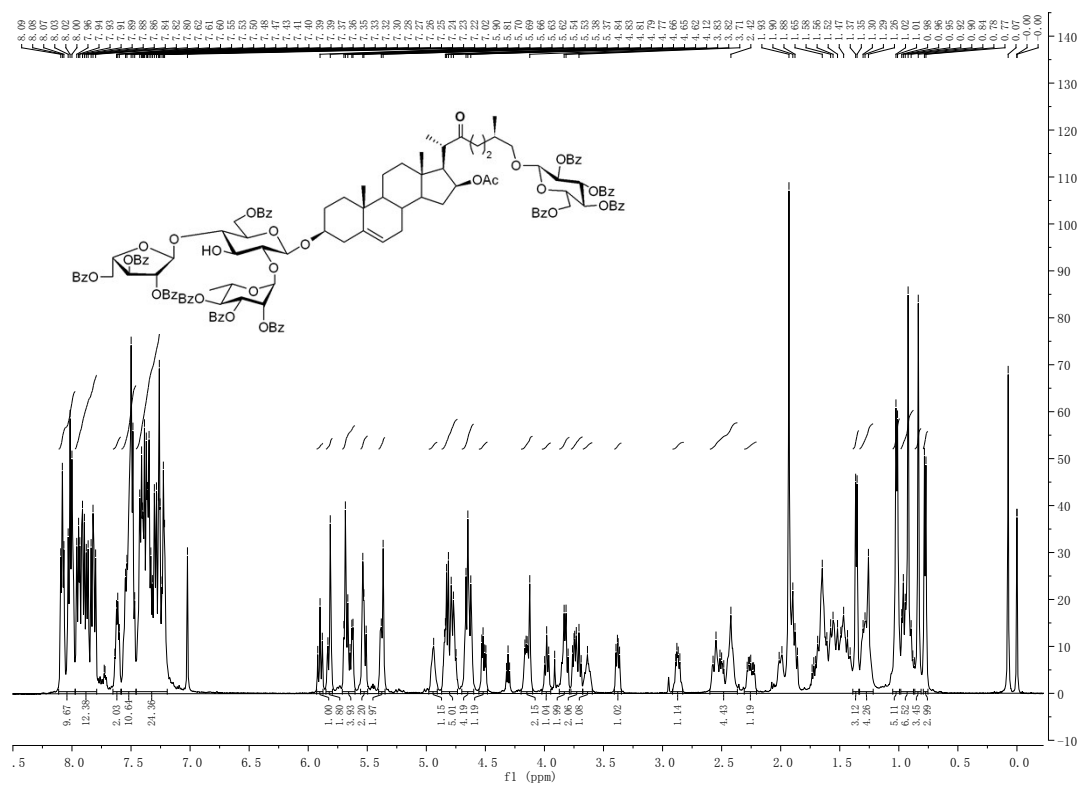

The <sup>1</sup>H NMR spectrum of **33** (CDCl<sub>3</sub>, 600 MHz)

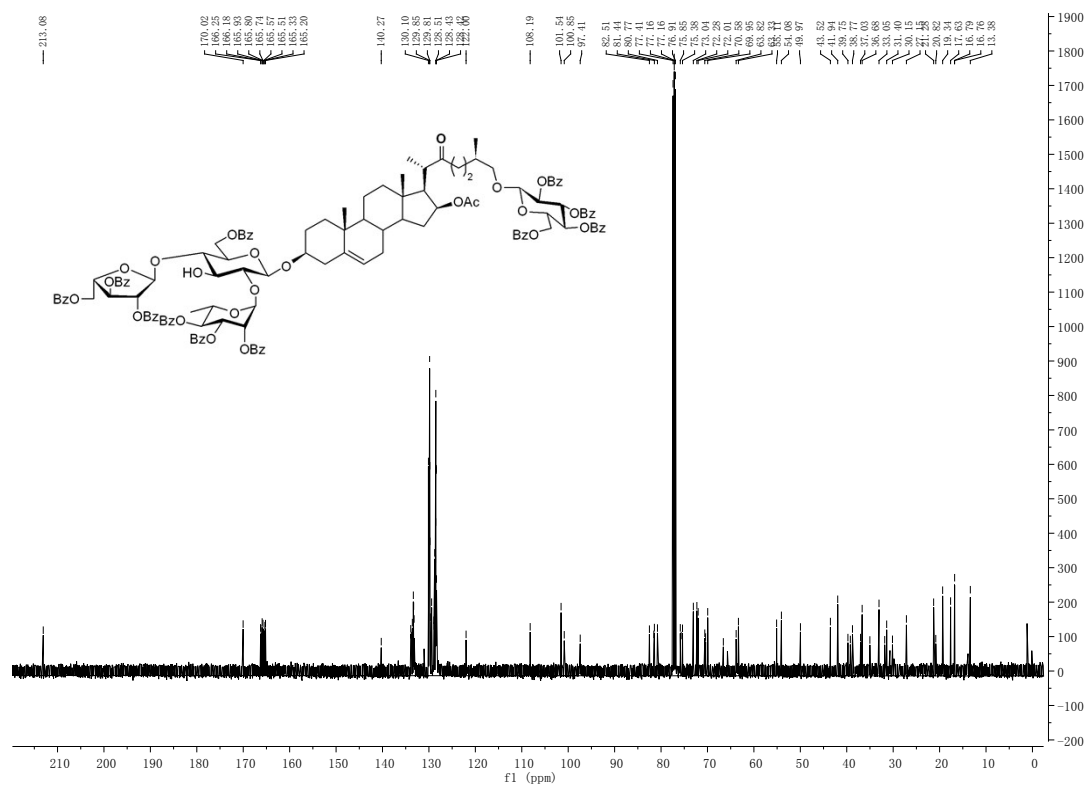

The <sup>13</sup>C NMR spectrum of **33** (CDCl<sub>3</sub>, 150 MHz)

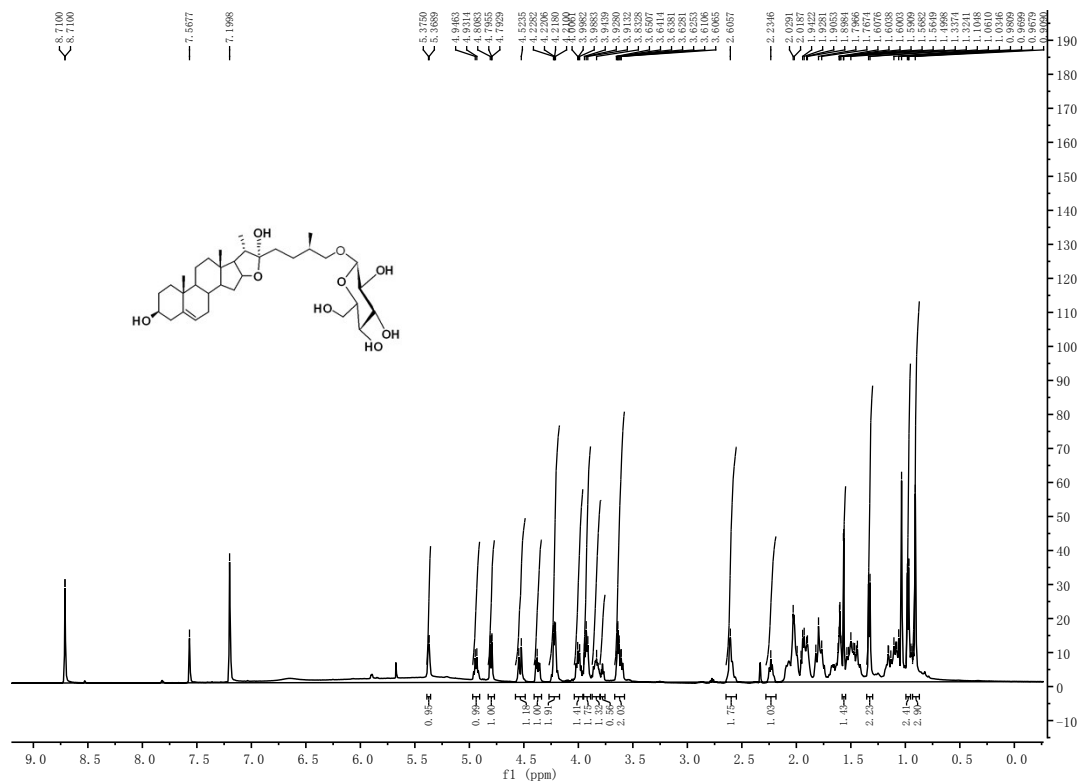

The  $^1\text{H}$  NMR spectrum of **1** (pyridine- $d_5$ , 500 MHz)

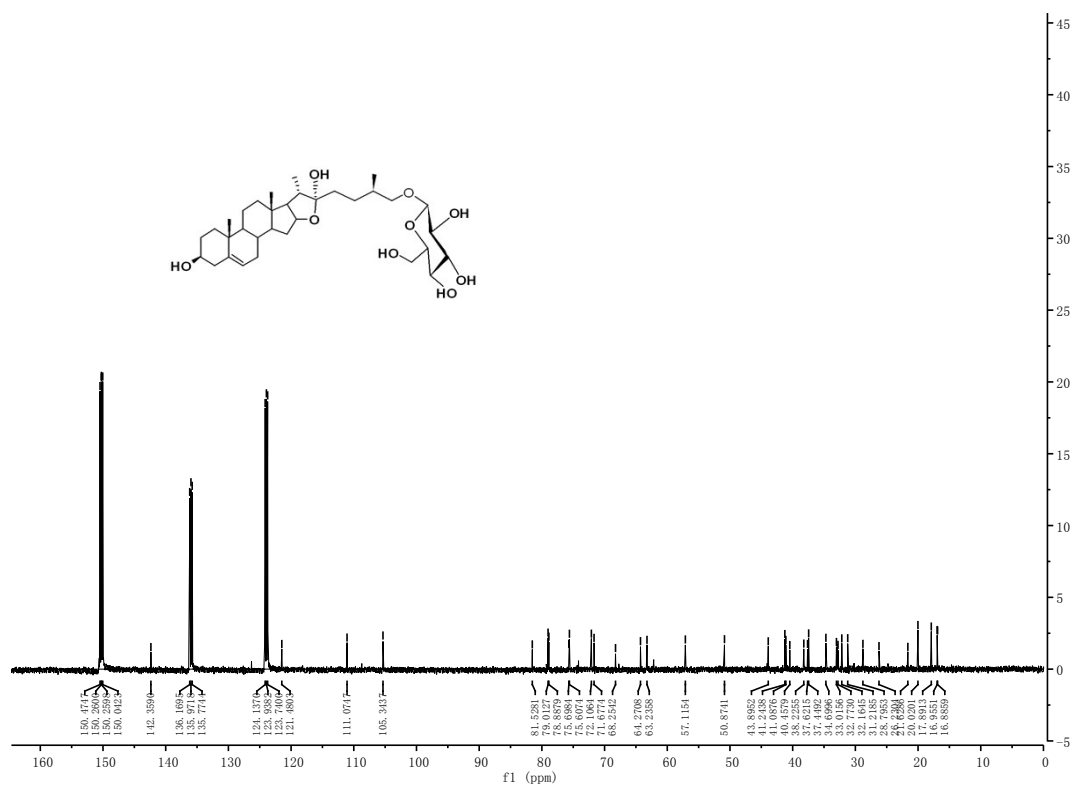

The  $^{13}\text{C}$  NMR spectrum of **1** (pyridine- $d_5$ , 125 MHz)

<sup>13</sup>C NMR data for funloside B (1).

| Aglycon No.    | Reported | Synthesized |
|----------------|----------|-------------|
| C-1            | 37.8     | 38.2        |
| C-2            | 32.6     | 33.0        |
| C-3            | 71.3     | 71.7        |
| C-4            | 43.5     | 43.9        |
| C-5            | 142.0    | 142.4       |
| C-6            | 121.1    | 121.5       |
| C-7            | 32.4     | 32.8        |
| C-8            | 31.8     | 32.2        |
| C-9            | 50.5     | 50.9        |
| C-10           | 37.1     | 37.4        |
| C-11           | 21.2     | 21.6        |
| C-12           | 40.1     | 40.4        |
| C-13           | 40.8     | 41.1        |
| C-14           | 56.7     | 57.1        |
| C-15           | 32.5     | 32.8        |
| C-16           | 81.1     | 81.5        |
| C-17           | 63.9     | 64.3        |
| C-18           | 16.5     | 16.9        |
| C-19           | 19.6     | 20.0        |
| C-20           | 40.7     | 41.1        |
| C-21           | 16.5     | 16.9        |
| C-22           | 110.7    | 111.1       |
| C-23           | 37.2     | 37.6        |
| C-24           | 28.4     | 28.8        |
| C-25           | 34.3     | 34.7        |
| C-26           | 75.2     | 75.6        |
| C-27           | 17.5     | 17.9        |
| (26-O)-β-D-Glc |          |             |
| 1'             | 105.0    | 105.3       |
| 2'             | 75.3     | 75.7        |
| 3'             | 78.6     | 78.9        |
| 4'             | 71.7     | 72.1        |
| 5'             | 78.5     | 78.9        |
| 6'             | 62.9     | 63.2        |



<sup>13</sup>C NMR data for lilioglycoside (2).

| Aglycon No.    | Reported | Synthesized |
|----------------|----------|-------------|
| C-1            | 37.5     | 38.0        |
| C-2            | 30.1     | 30.8        |
| C-3            | 78.2     | 78.7        |
| C-4            | 39.4     | 39.9        |
| C-5            | 141.0    | 141.4       |
| C-6            | 121.8    | 122.3       |
| C-7            | 32.4     | 32.8        |
| C-8            | 31.7     | 32.2        |
| C-9            | 50.4     | 50.8        |
| C-10           | 37.3     | 37.7        |
| C-11           | 21.2     | 21.7        |
| C-12           | 40.0     | 40.5        |
| C-13           | 40.9     | 41.3        |
| C-14           | 56.7     | 57.1        |
| C-15           | 32.5     | 32.8        |
| C-16           | 81.2     | 81.6        |
| C-17           | 63.9     | 64.3        |
| C-18           | 16.6     | 17.0        |
| C-19           | 19.5     | 19.9        |
| C-20           | 40.8     | 41.2        |
| C-21           | 16.6     | 16.9        |
| C-22           | 110.8    | 111.2       |
| C-23           | 37.1     | 37.6        |
| C-24           | 28.4     | 28.9        |
| C-25           | 34.4     | 34.8        |
| C-26           | 75.3     | 75.7        |
| C-27           | 17.5     | 18.0        |
| (26-O)-β-D-Glc |          |             |
| 1'             | 105.0    | 105.4       |
| 2'             | 75.4     | 75.9        |
| 3'             | 78.7     | 79.1        |
| 4'             | 71.8     | 72.2        |
| 5'             | 78.6     | 79.0        |
| 6'             | 62.9     | 63.3        |
| (3-O)-β-D-Glc  |          |             |
| 1''            | 102.7    | 103.1       |
| 2''            | 75.4     | 75.9        |
| 3''            | 78.7     | 79.1        |
| 4''            | 71.8     | 72.2        |
| 5''            | 78.6     | 79.0        |
| 6''            | 62.9     | 63.3        |



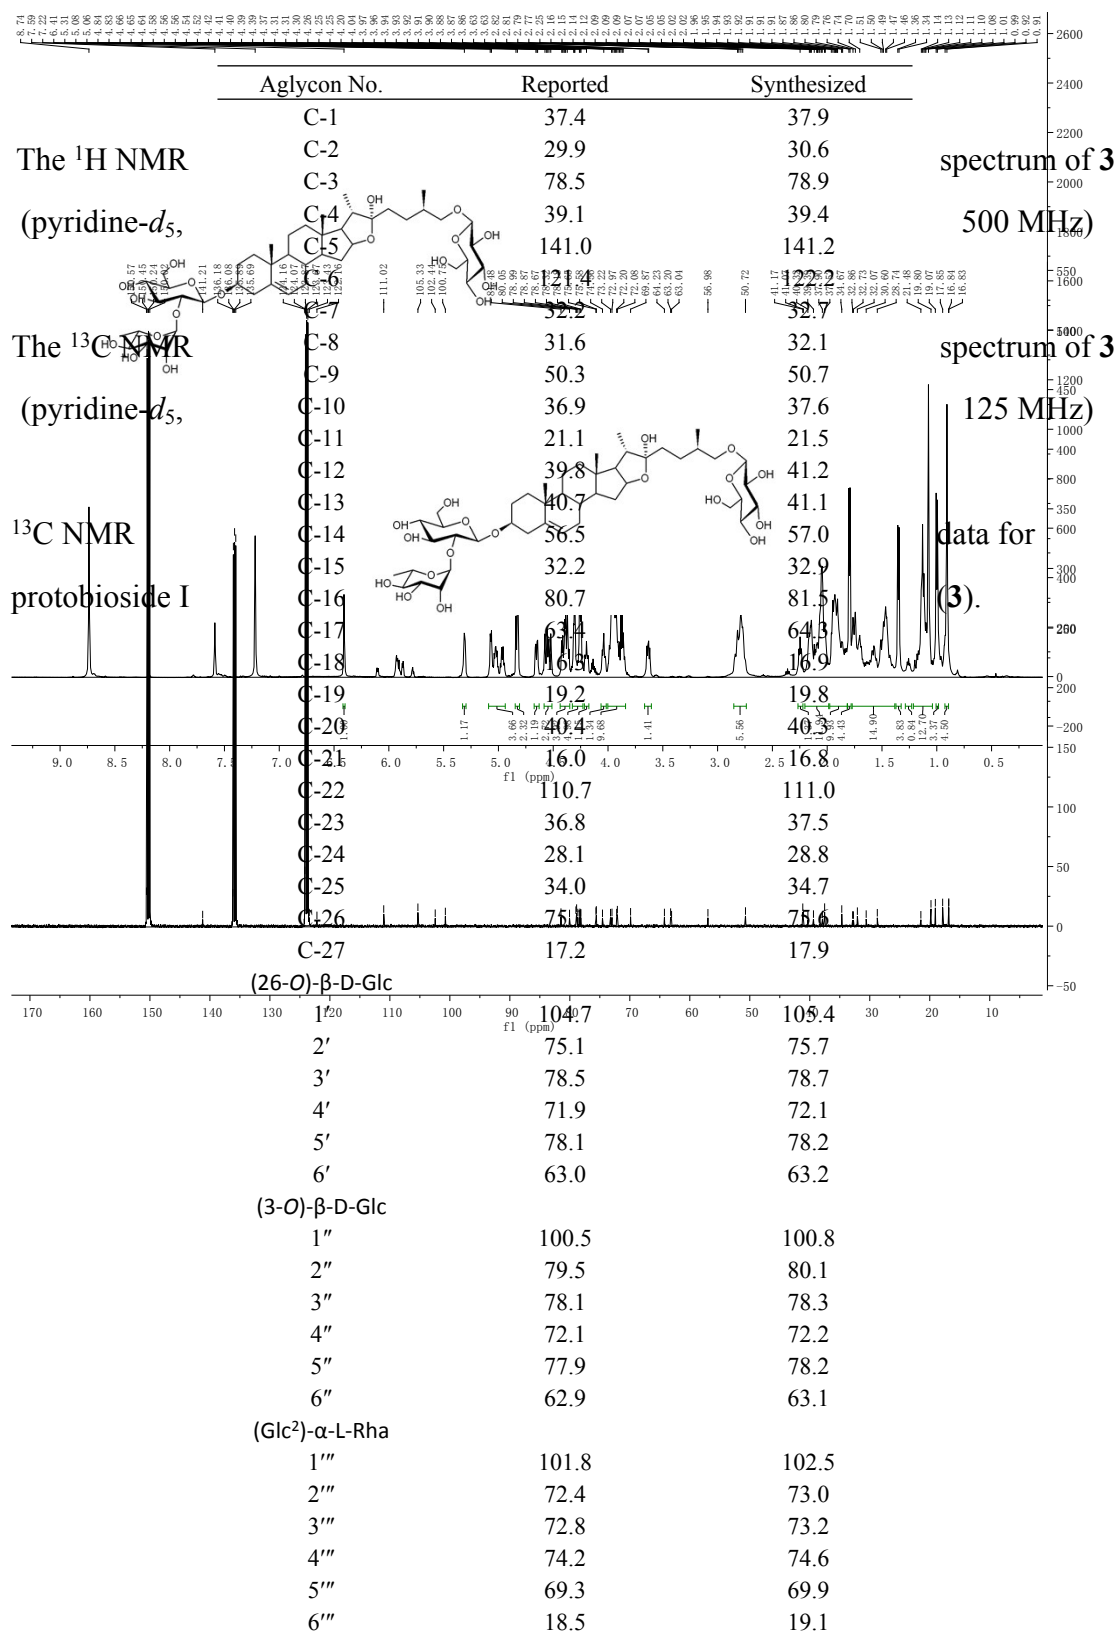

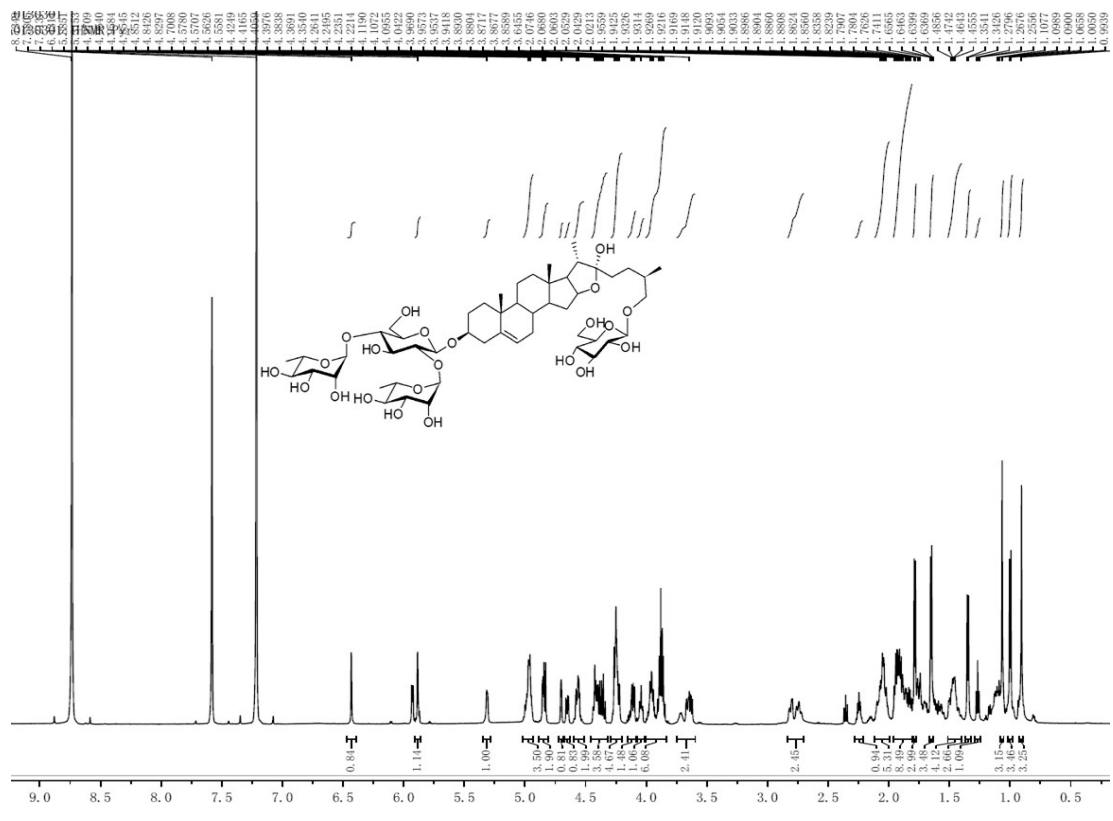

The  $^1\text{H}$  NMR spectrum of 4 (pyridine- $d_5$ , 500 MHz)

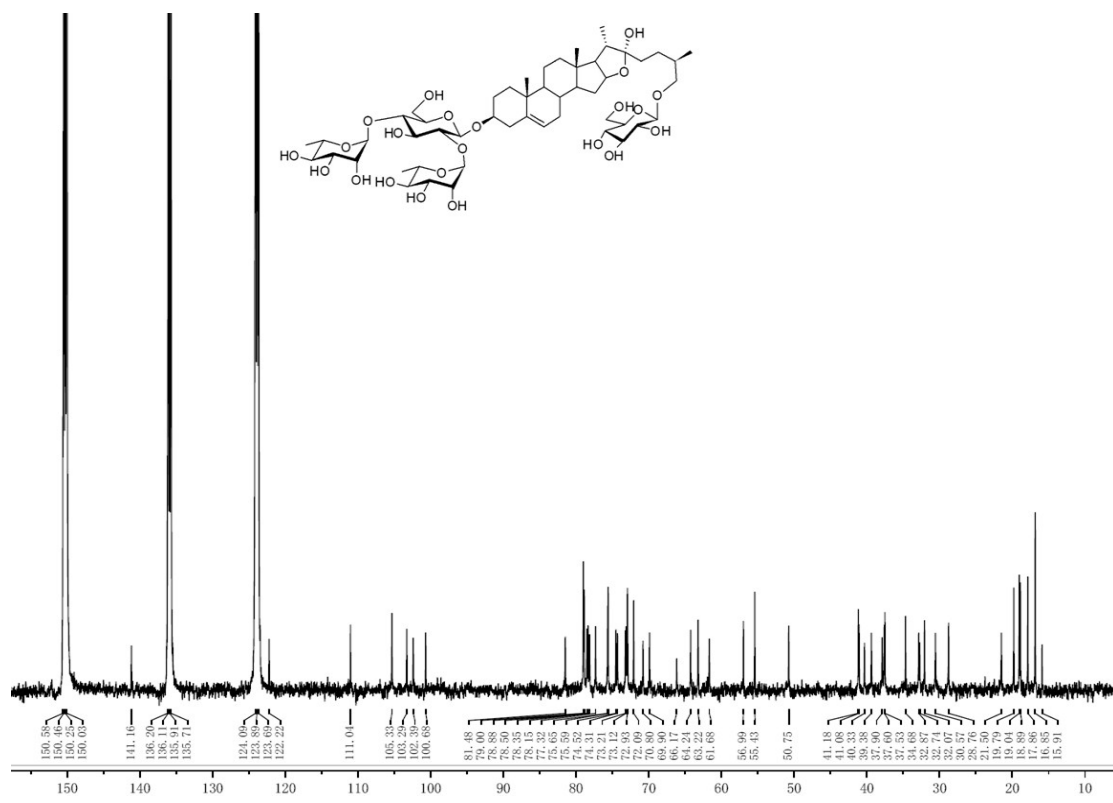

The  $^{13}\text{C}$  NMR spectrum of 4 (pyridine- $d_5$ , 125 MHz)

<sup>13</sup>C NMR data for protodioscin (4).

| Aglycon No.                 | Reported | Synthesized |
|-----------------------------|----------|-------------|
| C-1                         | 37.5     | 37.9        |
| C-2                         | 30.2     | 30.6        |
| C-3                         | 78.5     | 78.9        |
| C-4                         | 39.0     | 39.4        |
| C-5                         | 140.8    | 141.2       |
| C-6                         | 121.8    | 122.2       |
| C-7                         | 32.2     | 32.7        |
| C-8                         | 31.7     | 32.1        |
| C-9                         | 50.4     | 50.7        |
| C-10                        | 37.1     | 37.6        |
| C-11                        | 21.0     | 21.5        |
| C-12                        | 39.9     | 41.2        |
| C-13                        | 40.8     | 41.1        |
| C-14                        | 56.6     | 57.0        |
| C-15                        | 32.3     | 32.9        |
| C-16                        | 81.1     | 81.5        |
| C-17                        | 63.8     | 64.2        |
| C-18                        | 16.3     | 16.9        |
| C-19                        | 19.4     | 19.8        |
| C-20                        | 40.7     | 40.3        |
| C-21                        | 16.4     | 16.9        |
| C-22                        | 110.7    | 111.0       |
| C-23                        | 30.0     | 30.6        |
| C-24                        | 28.3     | 28.8        |
| C-25                        | 34.4     | 34.7        |
| C-26                        | 75.0     | 75.6        |
| C-27                        | 17.5     | 17.9        |
| (26-O)-β-D-Glc              |          |             |
| 1'                          | 105.1    | 105.3       |
| 2'                          | 75.2     | 75.7        |
| 3'                          | 78.4     | 78.9        |
| 4'                          | 71.7     | 72.1        |
| 5'                          | 78.3     | 78.4        |
| 6'                          | 62.9     | 63.2        |
| (3-O)-β-D-Glc               |          |             |
| 1''                         | 100.3    | 100.7       |
| 2''                         | 78.1     | 78.2        |
| 3''                         | 76.9     | 77.3        |
| 4''                         | 77.9     | 78.2        |
| 5''                         | 77.8     | 78.2        |
| 6''                         | 61.3     | 61.7        |
| (Glc <sup>2</sup> )-α-L-Rha |          |             |
| 1'''                        | 102.0    | 102.4       |
| 2'''                        | 72.5     | 72.9        |
| 3'''                        | 72.7     | 73.1        |
| 4'''                        | 74.1     | 74.5        |
| 5'''                        | 69.5     | 69.9        |
| 6'''                        | 18.6     | 19.0        |
| (Glc <sup>4</sup> )-α-L-Rha |          |             |
| 1''''                       | 102.9    | 103.3       |
| 2''''                       | 72.5     | 72.9        |
| 3''''                       | 72.8     | 73.1        |
| 4''''                       | 73.9     | 74.3        |
| 5''''                       | 70.4     | 70.8        |
| 6''''                       | 18.5     | 18.9        |

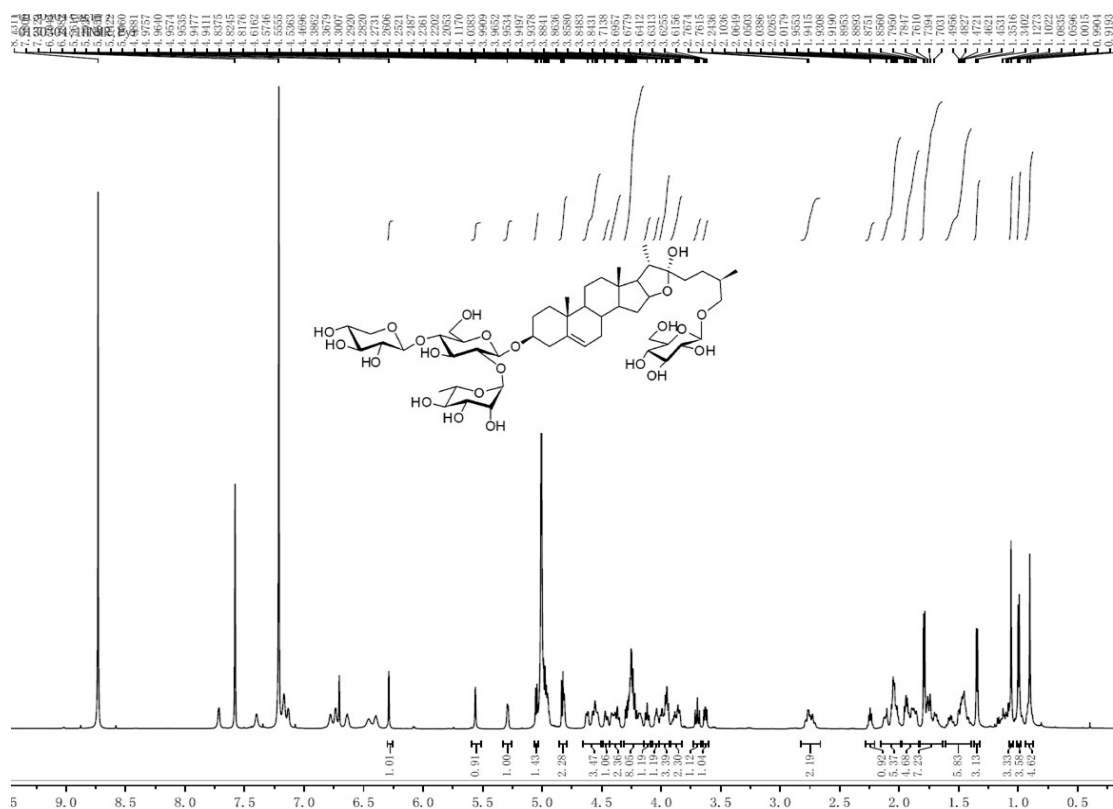

The  $^1\text{H}$  NMR spectrum of **5** (pyridine- $d_5$ , 500 MHz)

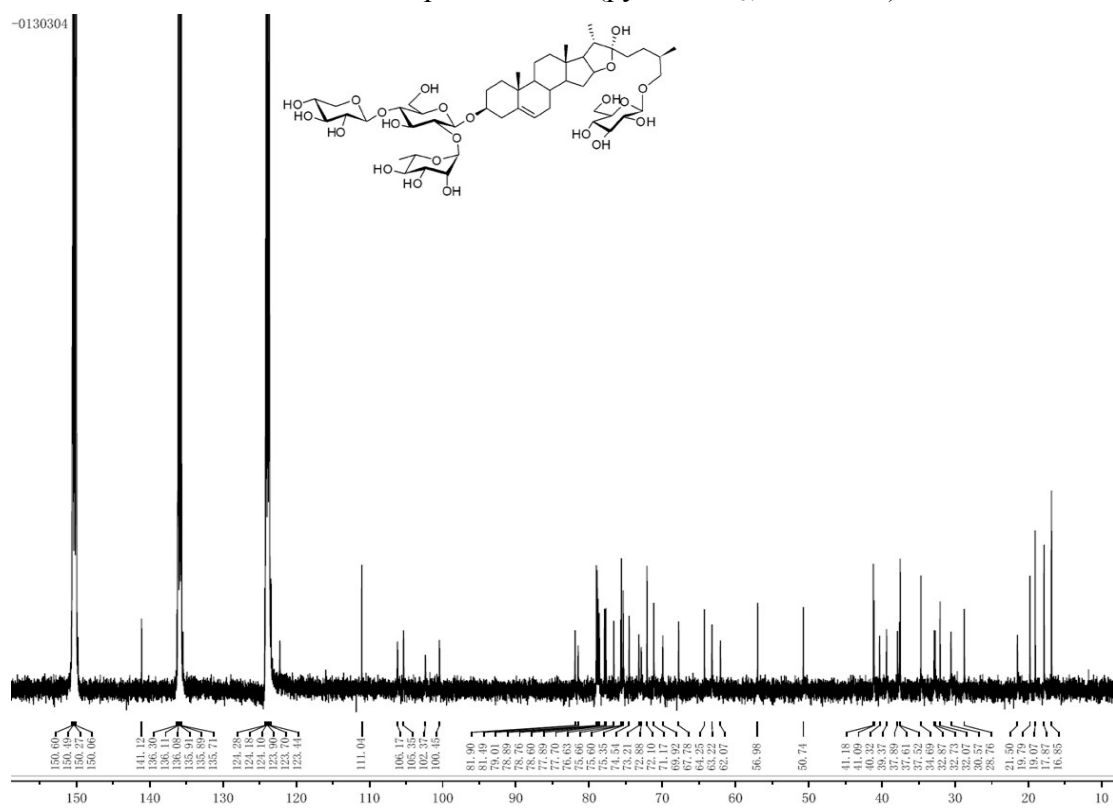

The  $^{13}\text{C}$  NMR spectrum of **5** (pyridine- $d_5$ , 125 MHz)

<sup>13</sup>C NMR data for pallidifloside I (5).

| Aglycon No.                  | Reported | Synthesized |
|------------------------------|----------|-------------|
| C-1                          | 37.2     | 37.9        |
| C-2                          | 29.9     | 30.6        |
| C-3                          | 77.8     | 78.6        |
| C-4                          | 38.7     | 39.4        |
| C-5                          | 140.4    | 141.2       |
| C-6                          | 121.6    | 122.2       |
| C-7                          | 32.1     | 32.9        |
| C-8                          | 31.4     | 32.1        |
| C-9                          | 50.0     | 50.7        |
| C-10                         | 36.9     | 37.6        |
| C-11                         | 20.8     | 21.5        |
| C-12                         | 39.7     | 40.3        |
| C-13                         | 40.4     | 41.1        |
| C-14                         | 56.3     | 50.7        |
| C-15                         | 32.2     | 32.9        |
| C-16                         | 81.1     | 81.9        |
| C-17                         | 63.6     | 64.3        |
| C-18                         | 16.2     | 16.9        |
| C-19                         | 19.1     | 21.5        |
| C-20                         | 40.5     | 41.2        |
| C-21                         | 16.2     | 16.9        |
| C-22                         | 110.4    | 111.0       |
| C-23                         | 37.0     | 37.6        |
| C-24                         | 28.1     | 28.8        |
| C-25                         | 34.0     | 34.7        |
| C-26                         | 75.0     | 75.7        |
| C-27                         | 17.2     | 17.9        |
| (26-O)-β-D-Glc               |          |             |
| 1'                           | 104.7    | 105.4       |
| 2'                           | 74.9     | 75.6        |
| 3'                           | 78.3     | 78.9        |
| 4'                           | 71.4     | 72.1        |
| 5'                           | 78.3     | 78.9        |
| 6'                           | 62.5     | 63.2        |
| (3-O)-β-D-Glc                |          |             |
| 1''                          | 99.7     | 100.5       |
| 2''                          | 77.2     | 77.9        |
| 3''                          | 77.0     | 77.7        |
| 4''                          | 80.8     | 81.5        |
| 5''                          | 76.0     | 76.6        |
| 6''                          | 61.3     | 62.1        |
| (Glc <sup>2</sup> )-α-L-Rha  |          |             |
| 1'''                         | 101.7    | 102.4       |
| 2'''                         | 72.2     | 72.9        |
| 3'''                         | 72.5     | 73.2        |
| 4'''                         | 73.9     | 74.5        |
| 5'''                         | 69.3     | 69.9        |
| 6'''                         | 18.5     | 19.1        |
| (Glc <sup>4</sup> )-β-D-Xyl- |          |             |
| 1''''                        | 105.5    | 106.2       |
| 2''''                        | 74.7     | 75.4        |
| 3''''                        | 78.1     | 78.8        |
| 4''''                        | 70.5     | 71.2        |
| 5''''                        | 67.1     | 67.8        |

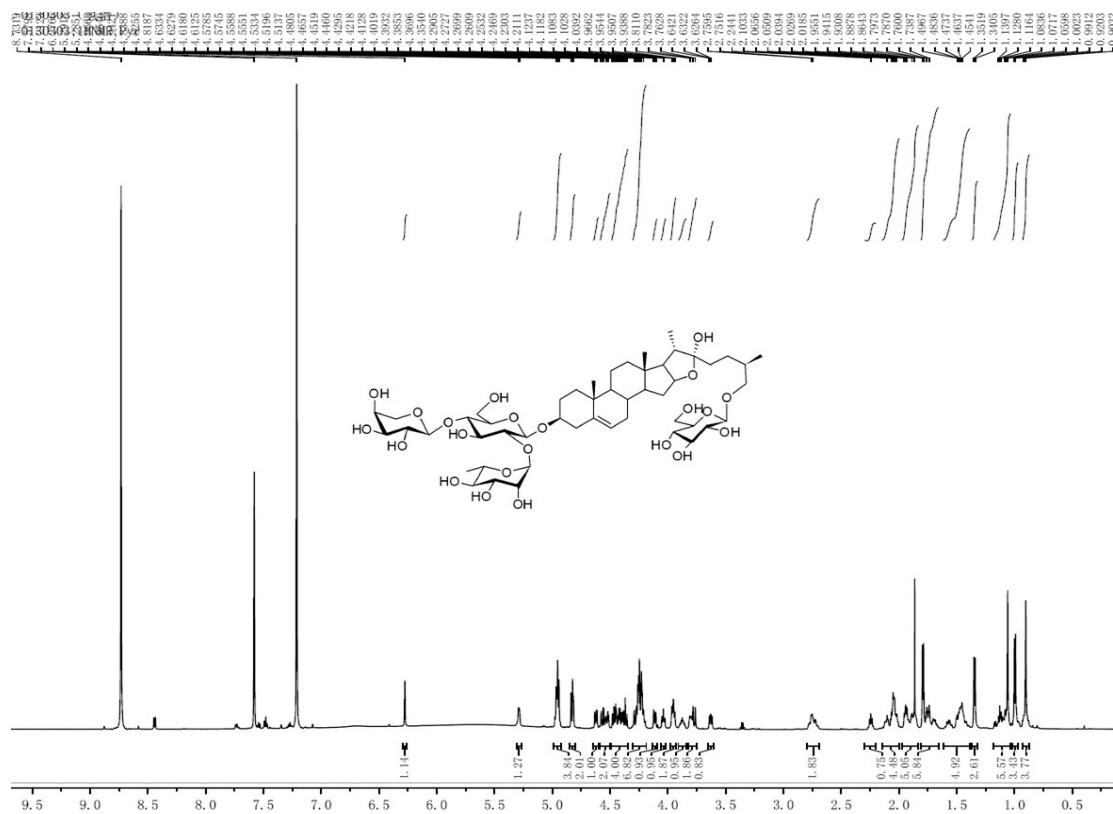

The <sup>1</sup>H NMR spectrum of 6 (pyridine-*d*<sub>5</sub>, 500 MHz)

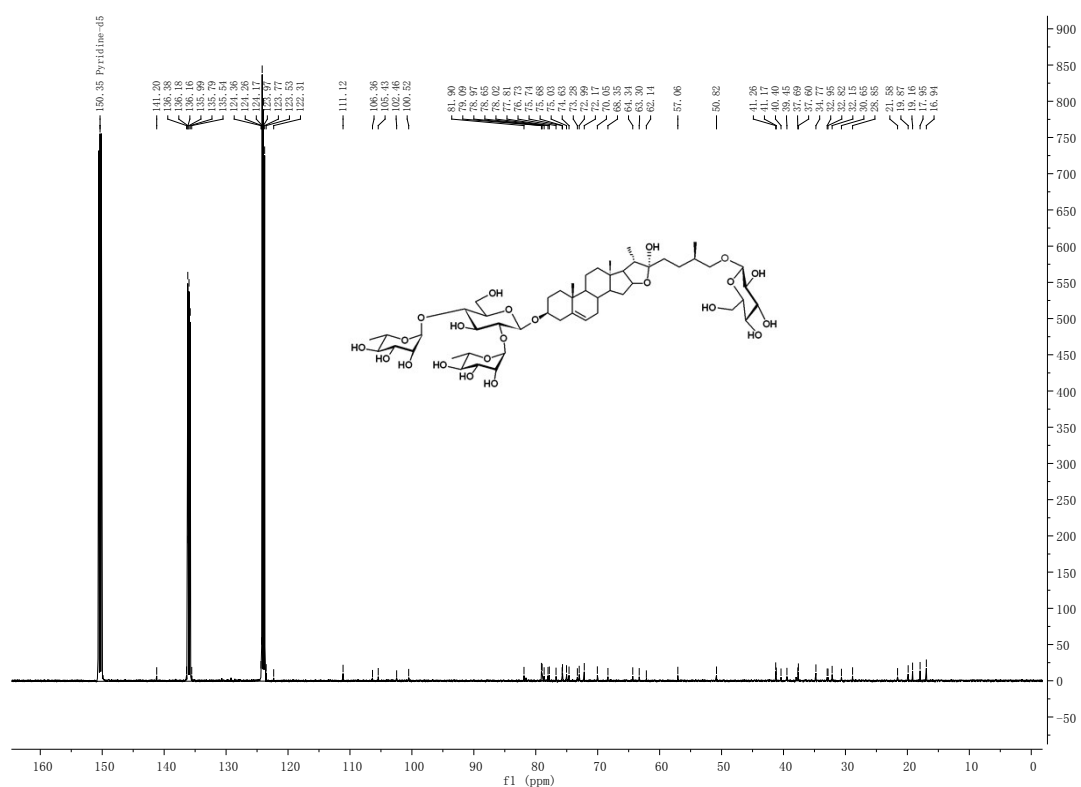

The <sup>13</sup>C NMR spectrum of 6 (pyridine-*d*<sub>5</sub>, 125 MHz)

<sup>13</sup>C NMR data for Coreajaponins A (**6**).

| Aglycon No.                  | Reported (in CD <sub>3</sub> OD) | Synthesized (in C <sub>5</sub> D <sub>5</sub> N)* | Methyl coreajaponins A (in C <sub>5</sub> D <sub>5</sub> N)** |
|------------------------------|----------------------------------|---------------------------------------------------|---------------------------------------------------------------|
| C-1                          | 37.1                             | 37.7                                              | 37.4                                                          |
| C-2                          | 29.3                             | 30.6                                              | 30.1                                                          |
| C-3                          | 77.9                             | 79.0                                              | 78.5                                                          |
| C-4                          | 39.4                             | 39.5                                              | 39.2                                                          |
| C-5                          | 140.4                            | 141.2                                             | 140.8                                                         |
| C-6                          | 121.2                            | 122.3                                             | 121.5                                                         |
| C-7                          | 31.7                             | 32.8                                              | 32.2                                                          |
| C-8                          | 31.3                             | 32.1                                              | 31.6                                                          |
| C-9                          | 50.2                             | 50.8                                              | 50.3                                                          |
| C-10                         | 36.6                             | 37.6                                              | 37.1                                                          |
| C-11                         | 20.5                             | 21.6                                              | 21.1                                                          |
| C-12                         | 39.4                             | 40.4                                              | 39.7                                                          |
| C-13                         | 40.4                             | 41.2                                              | 40.7                                                          |
| C-14                         | 56.3                             | 57.1                                              | 56.5                                                          |
| C-15                         | 31.3                             | 32.2                                              | 32.0                                                          |
| C-16                         | 81.0                             | 81.9                                              | 81.3                                                          |
| C-17                         | 63.6                             | 64.3                                              | 64.1                                                          |
| C-18                         | 15.3                             | 18.0                                              | 17.1                                                          |
| C-19                         | 18.4                             | 19.9                                              | 19.3                                                          |
| C-20                         | 39.7                             | 41.3                                              | 41.2                                                          |
| C-21                         | 14.6                             | 16.9                                              | 16.2                                                          |
| C-22                         | 112.5                            | 111.1                                             | 112.6                                                         |
| C-23                         | 29.9                             | 30.7                                              | 30.6                                                          |
| C-24                         | 27.5                             | 28.9                                              | 28.1                                                          |
| C-25                         | 33.5                             | 34.8                                              | 34.2                                                          |
| C-26                         | 74.5                             | 75.7                                              | 75.1                                                          |
| C-27                         | 15.8                             | 19.2                                              | 18.6                                                          |
| (26-O)-β-D-Glc               |                                  |                                                   |                                                               |
| 1'                           | 103.1                            | 105.4                                             | 104.9                                                         |
| 2'                           | 74.7                             | 75.7                                              | 75.1                                                          |
| 3'                           | 76.7                             | 78.7                                              | 78.3                                                          |
| 4'                           | 70.3                             | 72.2                                              | 71.7                                                          |
| 5'                           | 76.4                             | 79.0                                              | 78.6                                                          |
| 6'                           | 61.4                             | 63.3                                              | 62.5                                                          |
| (3-O)-β-D-Glc                |                                  |                                                   |                                                               |
| 1''                          | 98.9                             | 100.5                                             | 100.1                                                         |
| 2''                          | 77.0                             | 78.0                                              | 77.8                                                          |
| 3''                          | 77.1                             | 77.8                                              | 77.3                                                          |
| 4''                          | 79.5                             | 81.9                                              | 81.4                                                          |
| 5''                          | 76.1                             | 76.7                                              | 76.3                                                          |
| 6''                          | 60.4                             | 62.1                                              | 61.6                                                          |
| (Glc <sup>2</sup> )-α-L-Rha  |                                  |                                                   |                                                               |
| 1'''                         | 100.5                            | 102.5                                             | 102.5                                                         |
| 2'''                         | 70.7                             | 73.0                                              | 72.5                                                          |
| 3'''                         | 71.1                             | 73.3                                              | 72.8                                                          |
| 4'''                         | 72.9                             | 74.6                                              | 74.2                                                          |
| 5'''                         | 68.5                             | 70.0                                              | 69.4                                                          |
| 6'''                         | 16.5                             | 19.2                                              | 18.9                                                          |
| (Glc <sup>4</sup> )-β-L-Arap |                                  |                                                   |                                                               |
| 1''''                        | 104.0                            | 106.4                                             | 105.9                                                         |
| 2''''                        | 70.9                             | 73.0                                              | 72.6                                                          |
| 3''''                        | 73.7                             | 75.0                                              | 74.6                                                          |
| 4''''                        | 68.3                             | 70.0                                              | 69.6                                                          |
| 5''''                        | 66.3                             | 68.3                                              | 67.8                                                          |

\* <sup>13</sup>C NMR data for synthesized **6** (in C<sub>5</sub>D<sub>5</sub>N) are different from the reported coreajaponins A (in CD<sub>3</sub>OD), which are ascribed to solvent effect. However, the acquired <sup>13</sup>C NMR data are in agreement with those for Coreajaponins B (Methyl coreajaponins A) except that for C-22.

\*\* <sup>13</sup>C NMR data for Coreajaponins B.

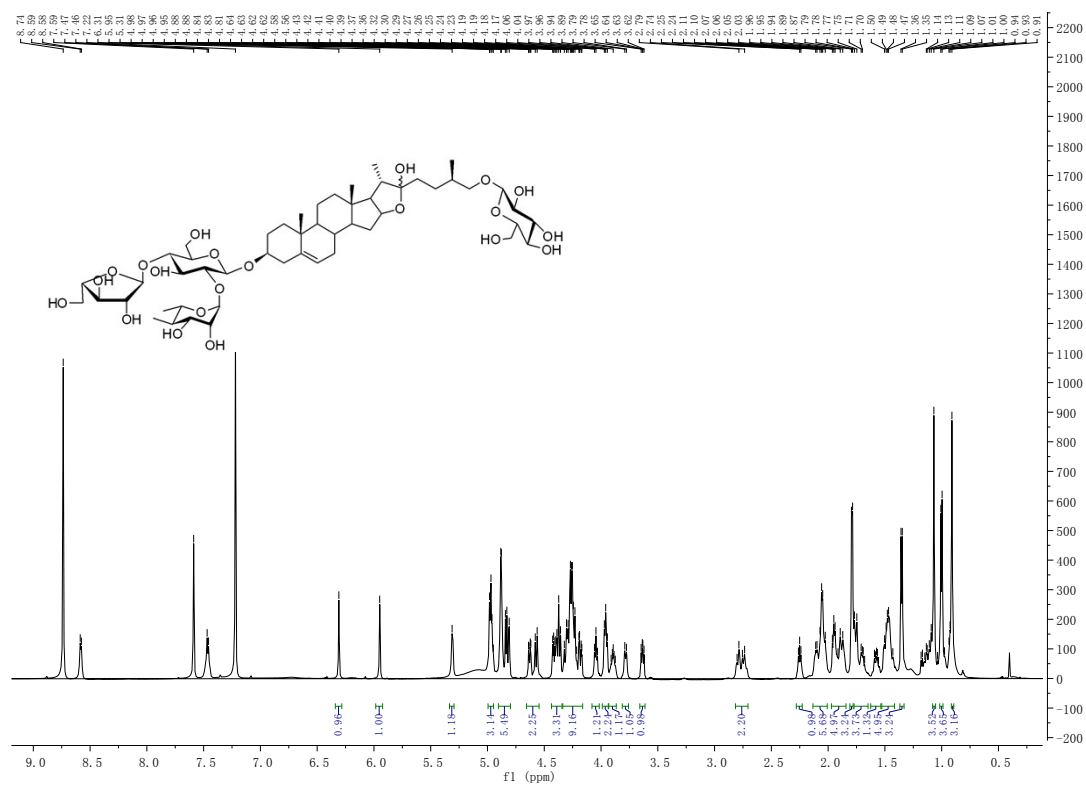

The  $^1\text{H}$  NMR spectrum of **7** ( $\text{pyridine-d}_5$ , 500 MHz)

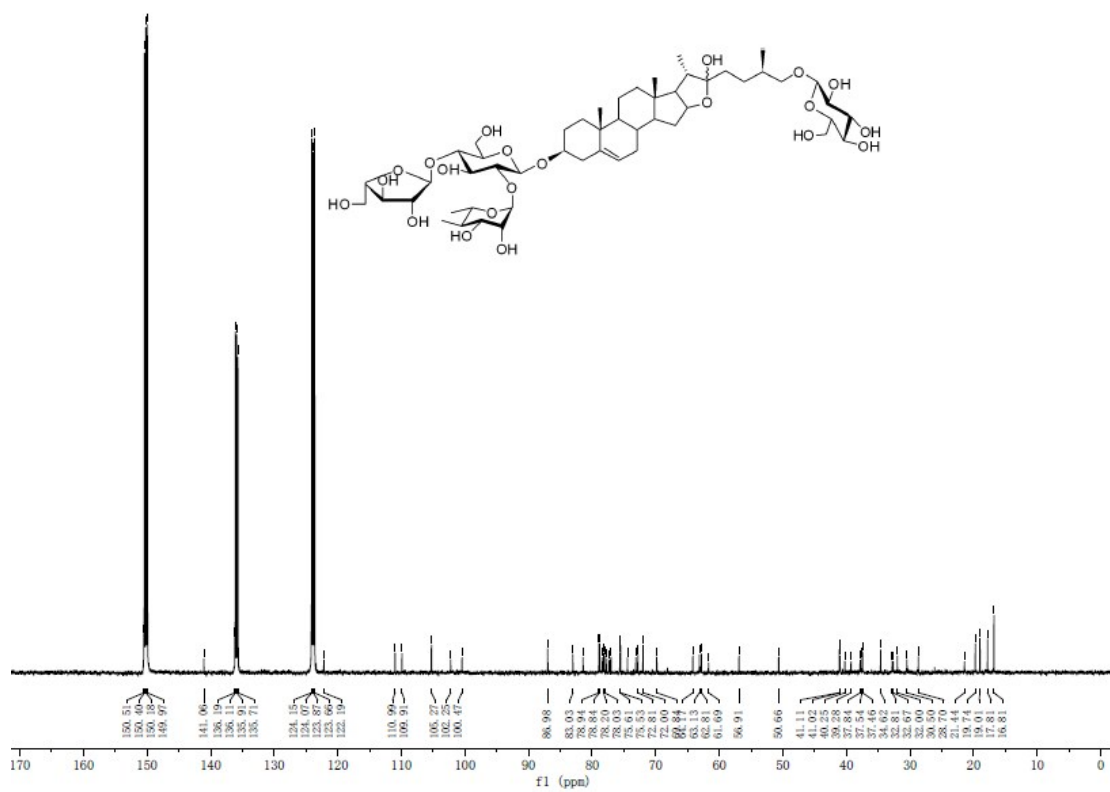

The  $^{13}\text{C}$  NMR spectrum of **7** ( $\text{pyridine-d}_5$ , 125 MHz)



<sup>13</sup>C NMR data for Parisaponin I (7).

| Aglycon No.                  | Reported | Synthesized |
|------------------------------|----------|-------------|
| C-1                          | 37.5     | 37.9        |
| C-2                          | 30.2     | 30.6        |
| C-3                          | 78.2     | 78.5        |
| C-4                          | 39.0     | 39.4        |
| C-5                          | 140.8    | 141.1       |
| C-6                          | 121.9    | 122.2       |
| C-7                          | 32.4     | 32.7        |
| C-8                          | 31.7     | 32.1        |
| C-9                          | 50.4     | 50.7        |
| C-10                         | 37.2     | 37.5        |
| C-11                         | 21.2     | 21.5        |
| C-12                         | 40.0     | 40.3        |
| C-13                         | 40.7     | 41.1        |
| C-14                         | 56.6     | 56.9        |
| C-15                         | 32.5     | 32.9        |
| C-16                         | 81.1     | 81.5        |
| C-17                         | 63.9     | 64.2        |
| C-18                         | 16.5     | 16.8        |
| C-19                         | 19.4     | 19.8        |
| C-20                         | 40.8     | 41.1        |
| C-21                         | 16.5     | 16.8        |
| C-22                         | 110.7    | 111.0       |
| C-23                         | 37.2     | 37.5        |
| C-24                         | 28.4     | 28.8        |
| C-25                         | 34.3     | 34.7        |
| C-26                         | 75.3     | 75.7        |
| C-27                         | 17.5     | 17.9        |
| (26-O)-β-D-Glc               |          |             |
| 1'                           | 105.0    | 105.3       |
| 2'                           | 75.2     | 75.6        |
| 3'                           | 78.6     | 79.0        |
| 4'                           | 71.7     | 72.1        |
| 5'                           | 78.5     | 78.9        |
| 6'                           | 62.9     | 63.2        |
| (3-O)-β-D-Glc                |          |             |
| 1''                          | 100.2    | 100.6       |
| 2''                          | 77.4     | 77.8        |
| 3''                          | 77.7     | 78.1        |
| 4''                          | 77.1     | 77.4        |
| 5''                          | 76.7     | 77.1        |
| 6''                          | 61.4     | 61.7        |
| (Glc <sup>2</sup> )-α-L-Rha  |          |             |
| 1'''                         | 101.9    | 102.3       |
| 2'''                         | 72.5     | 72.8        |
| 3'''                         | 72.8     | 73.2        |
| 4'''                         | 74.2     | 74.5        |
| 5'''                         | 69.5     | 69.9        |
| 6'''                         | 18.7     | 19.1        |
| (Glc <sup>4</sup> )-α-L-Araf |          |             |
| 1''''                        | 109.7    | 110.0       |
| 2''''                        | 82.7     | 83.1        |
| 3''''                        | 78.0     | 78.3        |
| 4''''                        | 86.7     | 87.1        |
| 5''''                        | 62.5     | 62.9        |
